# Supplementary material for: Purging of highly deleterious mutations through severe bottlenecks in Alpine ibex
Source: PubMed Central journal article supplement (PMC7035315; doi:10.1038/s41467-020-14803-1), 2020-02-21
Supplement: 41467_2020_14803_MOESM1_ESM.pdf [file 41467_2020_14803_MOESM1_ESM.pdf]

## **Supplementary information**

Purging of highly deleterious mutations through severe bottlenecks in ibex

Grossen et al.

## TABLE OF CONTENTS

|                                            |    |
|--------------------------------------------|----|
| <u>Supplementary Figure 1</u> .....        | 3  |
| <u>Supplementary Figure 2A</u> .....       | 3  |
| <u>Supplementary Figure 2B</u> .....       | 3  |
| <u>Supplementary Figure 3A</u> .....       | 4  |
| <u>Supplementary Figure 3B</u> .....       | 5  |
| <u>Supplementary Figures 4A - 4D</u> ..... | 6  |
| <u>Supplementary Figures 5A - 5D</u> ..... | 7  |
| <u>Supplementary Figure 6</u> .....        | 8  |
| <u>Supplementary Figure 7A</u> .....       | 9  |
| <u>Supplementary Figure 7B</u> .....       | 10 |
| <u>Supplementary Figure 7C</u> .....       | 10 |
| <u>Supplementary Figure 7D</u> .....       | 11 |
| <u>Supplementary Figure 8</u> .....        | 12 |
| <u>Supplementary Figure 9</u> .....        | 12 |
| <u>Supplementary Figure 10</u> .....       | 13 |
| <u>Supplementary Figure 13A</u> .....      | 16 |
| <u>Supplementary Figure 13B</u> .....      | 16 |
| <u>Supplementary Figure 14</u> .....       | 17 |
| <u>Supplementary Figure 15</u> .....       | 18 |
| <u>Supplementary Figure 18</u> .....       | 21 |
| <u>Supplementary Figure 19</u> .....       | 22 |
| <u>Supplementary Figure 20</u> .....       | 23 |
| <u>Supplementary Figure 21</u> .....       | 24 |
| <u>Supplementary Figure 22</u> .....       | 25 |
| <u>Supplementary Figures 23 – 31</u> ..... | 26 |
| <u>Supplementary Figures 32 - 39</u> ..... | 31 |
| <u>Supplementary Figure 45</u> .....       | 39 |
| <u>Supplementary Table 1A</u> .....        | 40 |
| <u>Supplementary Table 1B</u> .....        | 41 |
| <u>Supplementary Table 2</u> .....         | 42 |
| <u>Supplementary Table 3</u> .....         | 43 |
| <u>Supplementary Table 4</u> .....         | 45 |
| <u>Supplementary Table 5</u> .....         | 45 |
| <u>Supplementary Table 6</u> .....         | 46 |
| <u>Supplementary Note 1</u> .....          | 48 |
| <u>Supplementary References</u> .....      | 50 |

## SUPPLEMENTARY FIGURES

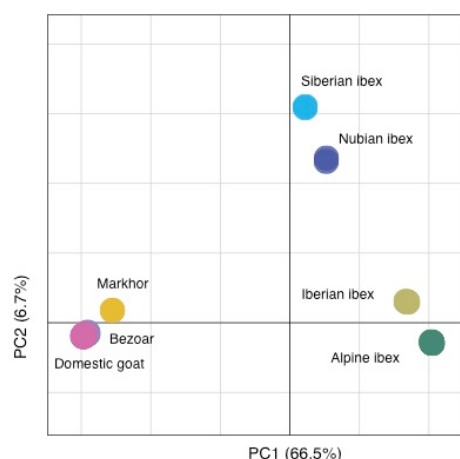

**Supplementary Figure 1: Principal component analysis.** All ibex species under study are included. Colors indicate different species.

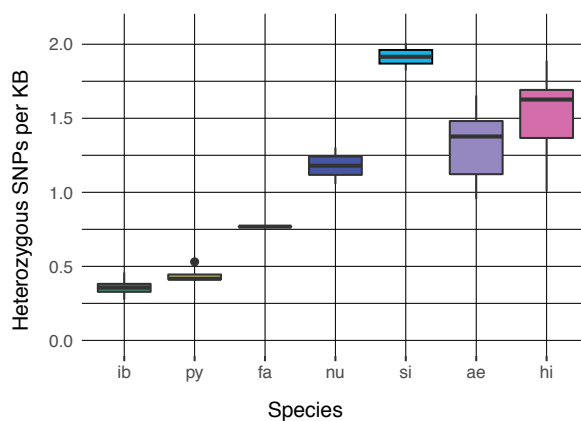

**Supplementary Figure 2A: Genome-wide heterozygosity per species.** Heterozygosity is expressed as the number of heterozygous autosomal SNPs per kb. ib: *Capra ibex*, py: *C. pyrenaica*, fa: *C. falconeri*, nu: *C. nubiana*, si: *C. sibirica*, ae: *C. aegagrus*, hi: *C. hircus*. Box plots show the median, the 25<sup>th</sup> and 75<sup>th</sup> percentiles, Tukey whiskers (median  $\pm$  1.5 times interquartile range), and outliers ( $\bullet$ ).

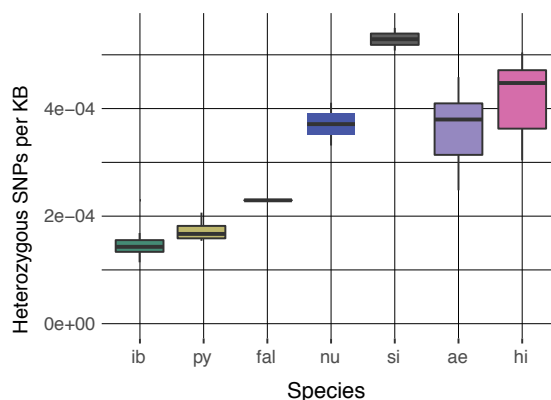

**Supplementary Figure 2B: Genome-wide heterozygosity per species in coding sequences (CDS).** Heterozygosity is expressed as the number of heterozygous SNPs per kb of CDS. ib: *Capra ibex*, py: *C. pyrenaica*, fa: *C. falconeri*, nu: *C. nubiana*, si: *C. sibirica*, ae: *C. aegagrus*, hi: *C. hircus*. Box plot elements as in Supplementary Figure 2A.

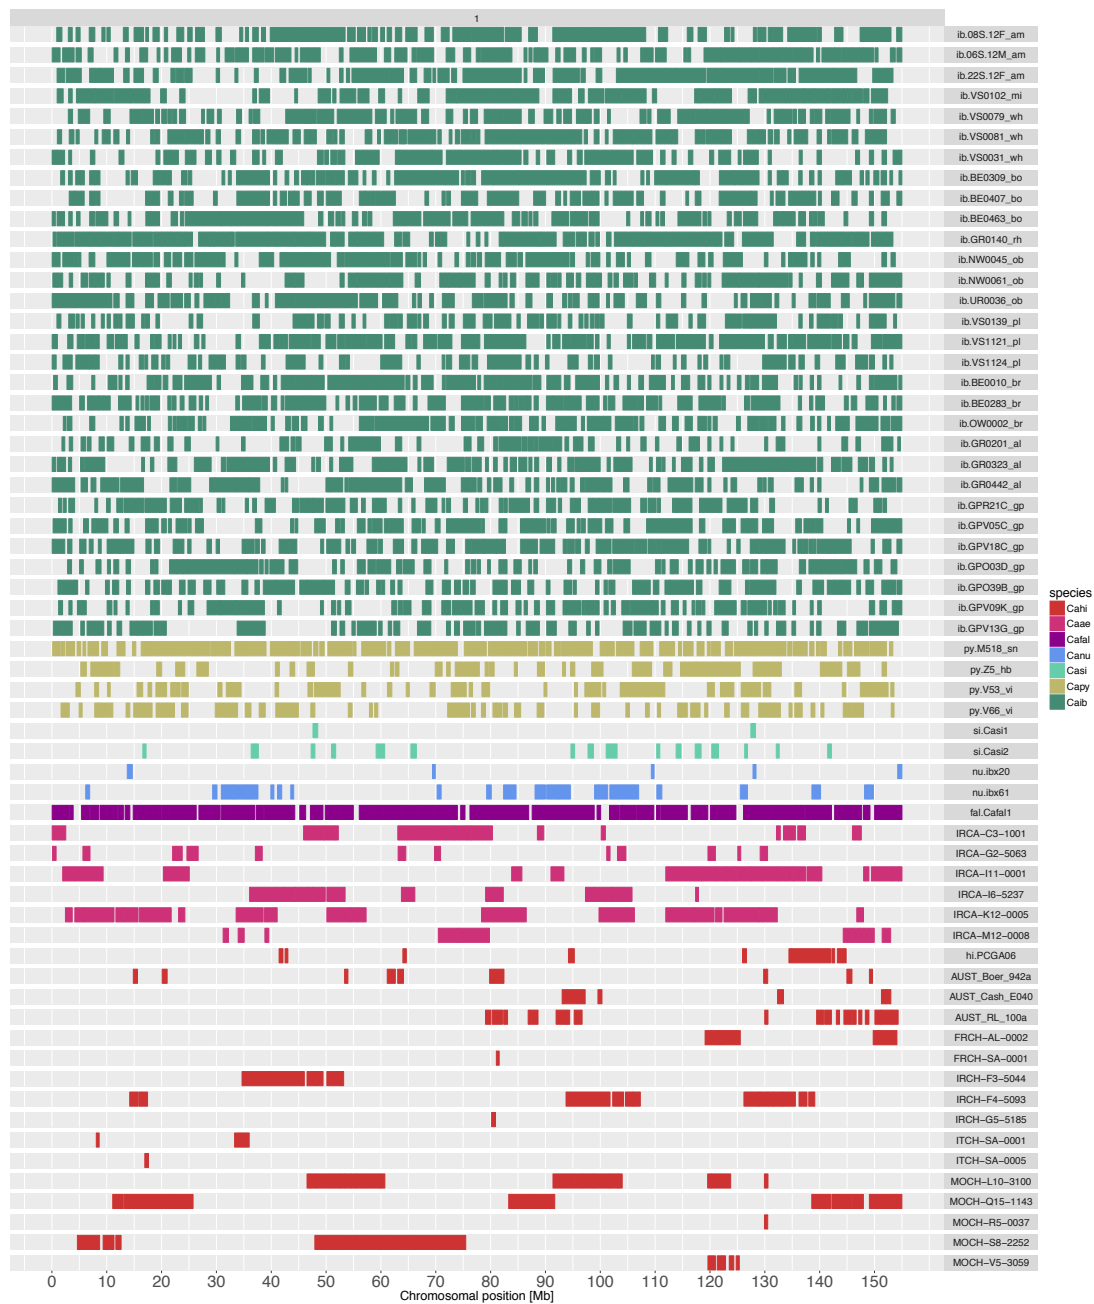

**Supplementary Figure 3A: Runs of homozygosity (ROH) along chromosome 1.** Bcftools analysis with viterbi-training option turned off. The alternative allele frequency prior was set to 0.4. Colors represent species as in Supplementary Figures 1 and 2. Caib: *Capra ibex*, Capy: *C. pyrenaica*, Cafal: *C. falconeri*, Canu: *C. nubiana*, Casi: *C. sibirica*, Caae: *C. aegagrus*, Cahi: *C. hircus*.

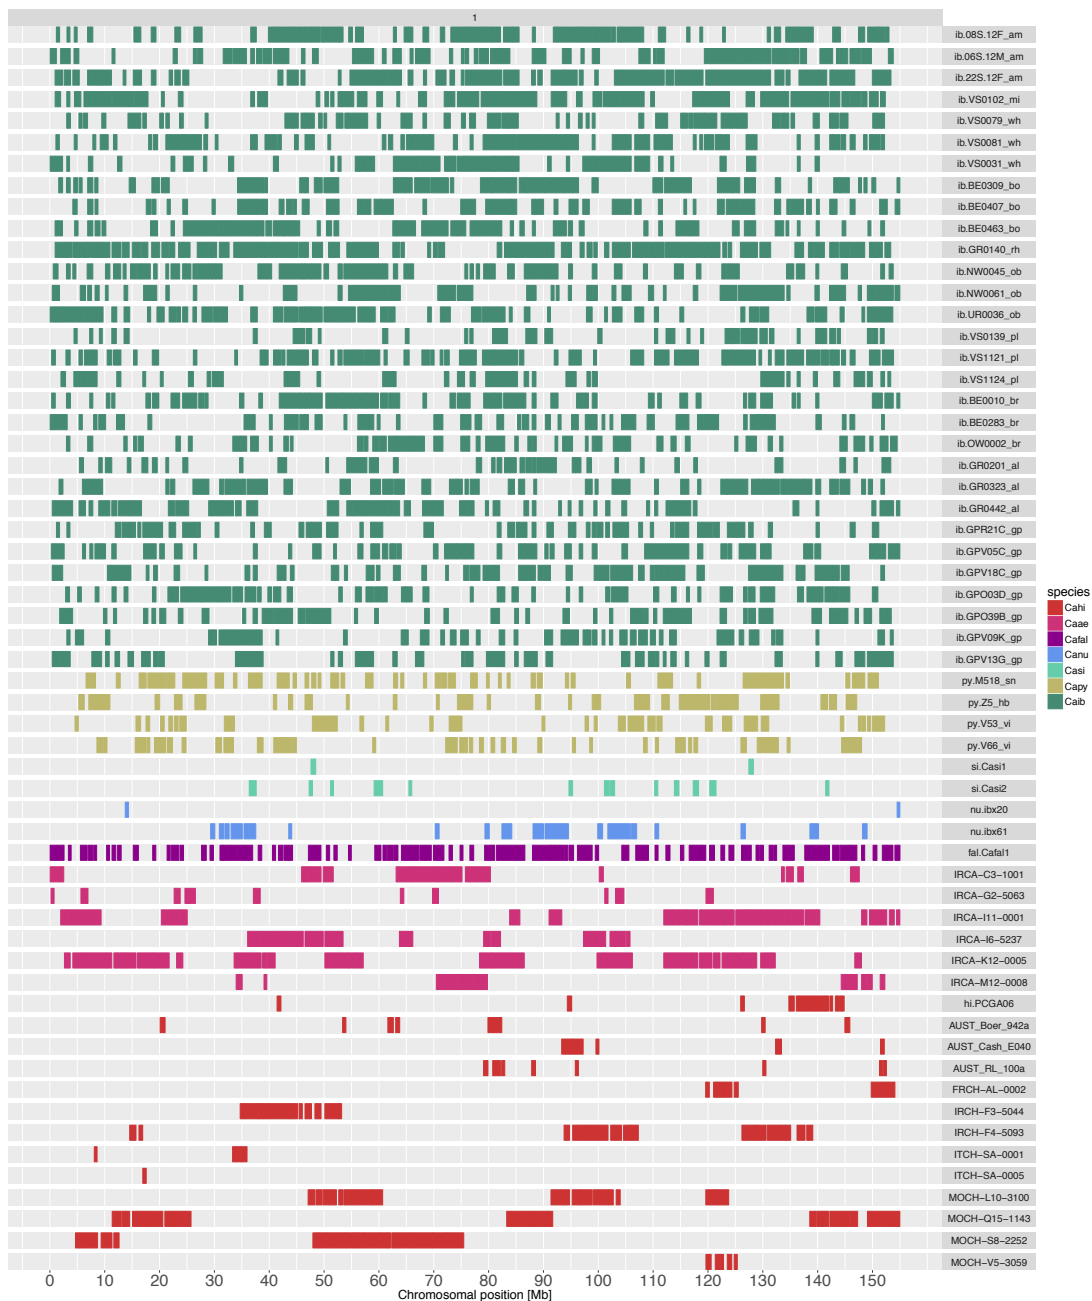

**Supplementary Figure 3B: Runs of homozygosity (ROH) along chromosome 1.** Bcftools was run with the viterbi-training option turned on. The alternative allele frequency prior was set to 0.4. Colors represent species as in Supplementary Figures 1 and 2. Caib: *Capra ibex*, Capi: *C. pyrenaica*, Cafal: *C. falconeri*, Canu: *C. nubiana*, Casi: *C. sibirica*, Caae: *C. aegagrus*, Cahi: *C. hircus*.

**Supplementary Figures 4A - 4D: Runs of homozygosity (ROH) analysis with different bcftools settings.** Red lines show estimated state (0 corresponds to ROH region, 1 to non-ROH region). The blue line shows heterozygosity in a sliding window (window size=100 bp, step size=1 bp) along chromosomal positions. Data is shown for the *C. ibex* individual GPR21C. The window represents chromosome 23 and positions 15-30 Mb.

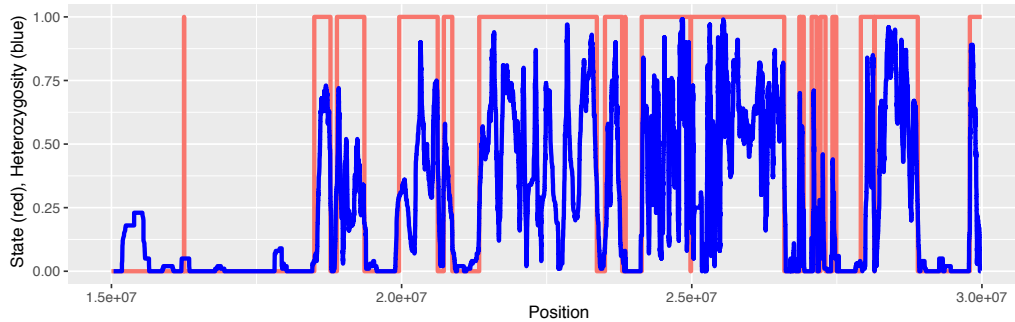

**Supplementary Figure 4A:** Allele frequency prior (af.dflt) set to 0.4.

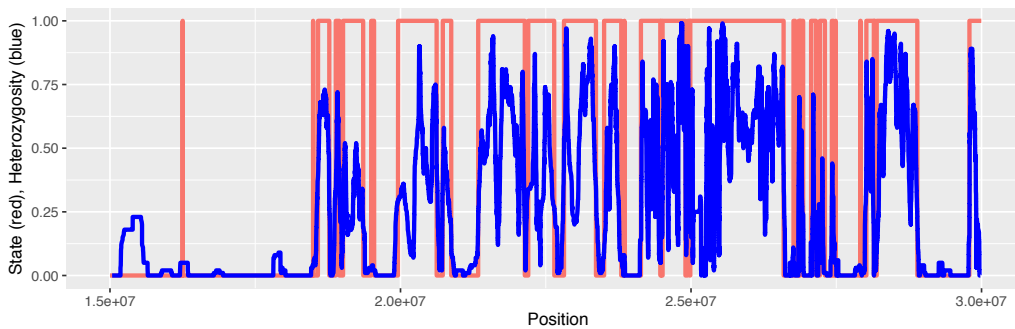

**Supplementary Figure 4B:** Allele frequency prior (af.dflt) set to 0.4 and viterbi-training option turned on.

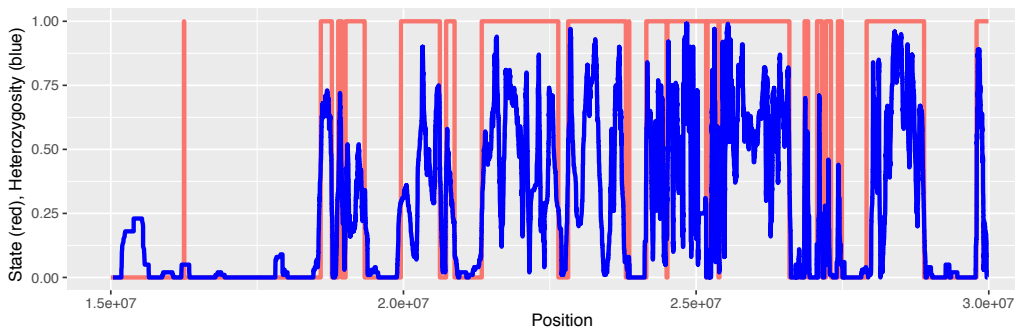

**Supplementary Figure 4C:** Allele frequency priors were set to allele frequencies observed in the Gran Paradiso population.

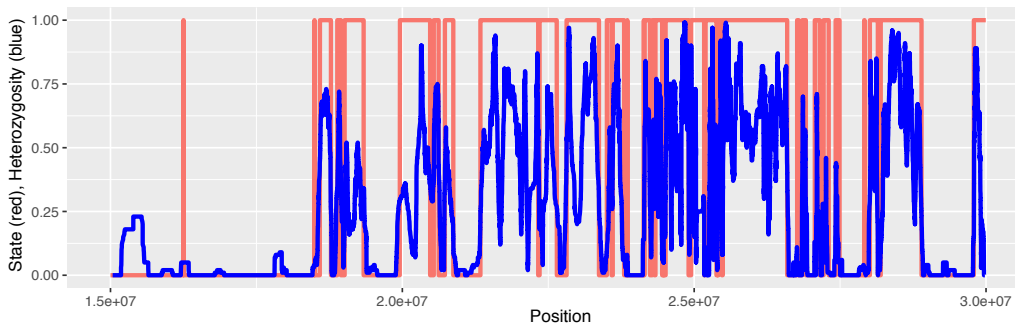

**Supplementary Figure 4D:** Allele frequency priors were set to allele frequencies observed in the Gran Paradiso population and viterbi-training option turned on.

**Supplementary Figures 5A - 5D: Runs of homozygosity (ROH) analysis with different bcftools settings.** Red lines show estimated state (0 corresponds to ROH region, 1 to non-ROH region). The blue line shows heterozygosity in a sliding window (window size=100 bp, step size=1 bp) along chromosomal positions. Data is shown for the *C. ibex* individual GPV05C. The window represents chromosome 23 and positions 15-30 Mb.

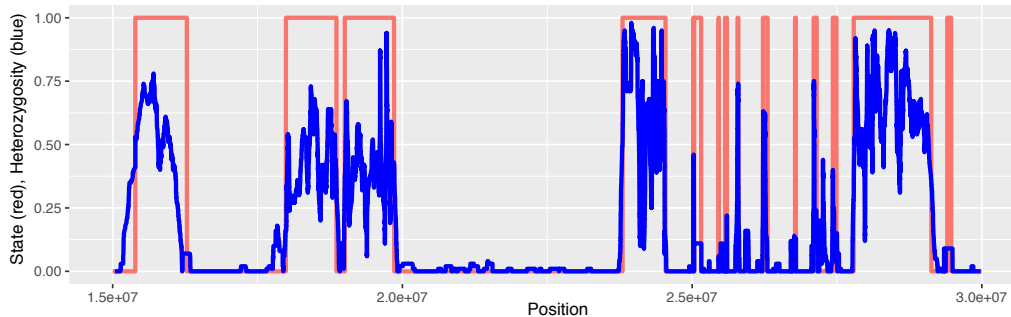

**Supplementary Figure 5A:** Allele frequency prior (af.dtl) set to 0.4.

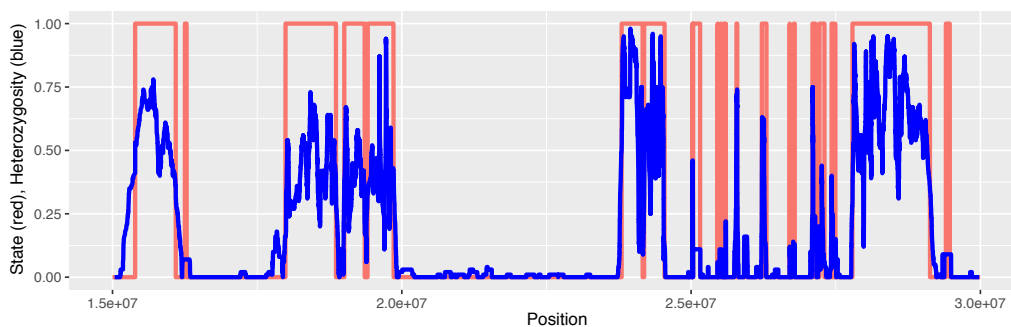

**Supplementary Figure 5B:** Allele frequency prior (af.dtl) set to 0.4 and viterbi-training option turned on.

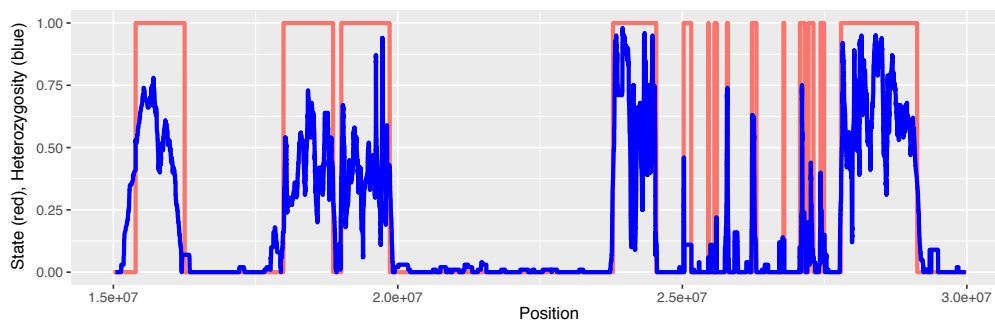

**Supplementary Figure 5C:** Allele frequency priors were set to allele frequencies observed in the Gran Paradiso population.

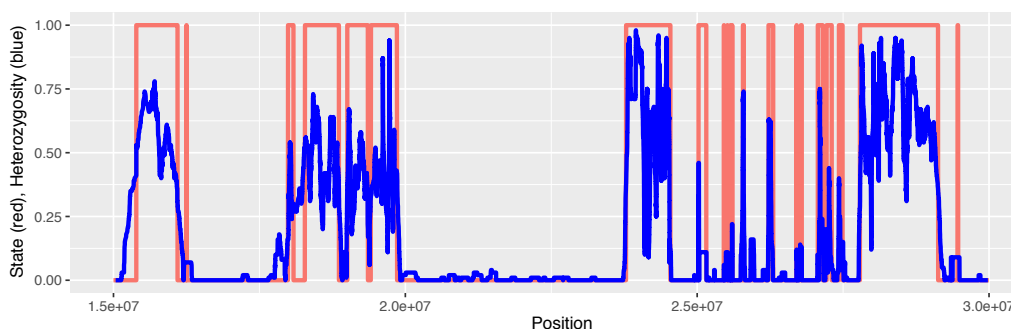

**Supplementary Figure 5D:** Allele frequency priors were set to allele frequencies observed in the Gran Paradiso population and viterbi-training option turned on.

Alignment of trimmed reads to domestic goat reference genome (CHIR\_1.0) and mark duplicates (bowtie2)

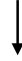

SNP calling GATK (HaplotypeCaller, GenotypeGVCF, VariantFiltration) and Freebayes

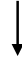

SNP annotation (snpEff)

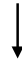

Only retain high quality mutations in conserved regions:

GERP > -2

FPKM > 0.3 in at least one of 10 organs

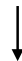

Categorization:

snpEff predicted impact: High, Moderate, Low, Modifier

GERP scores: > 6, 4 to 6, 2 to 4, -2 to 2

**Supplementary Figure 6: Pipeline for SNP calling, validation and categorization of mutational impact.** See Methods for details on each step.



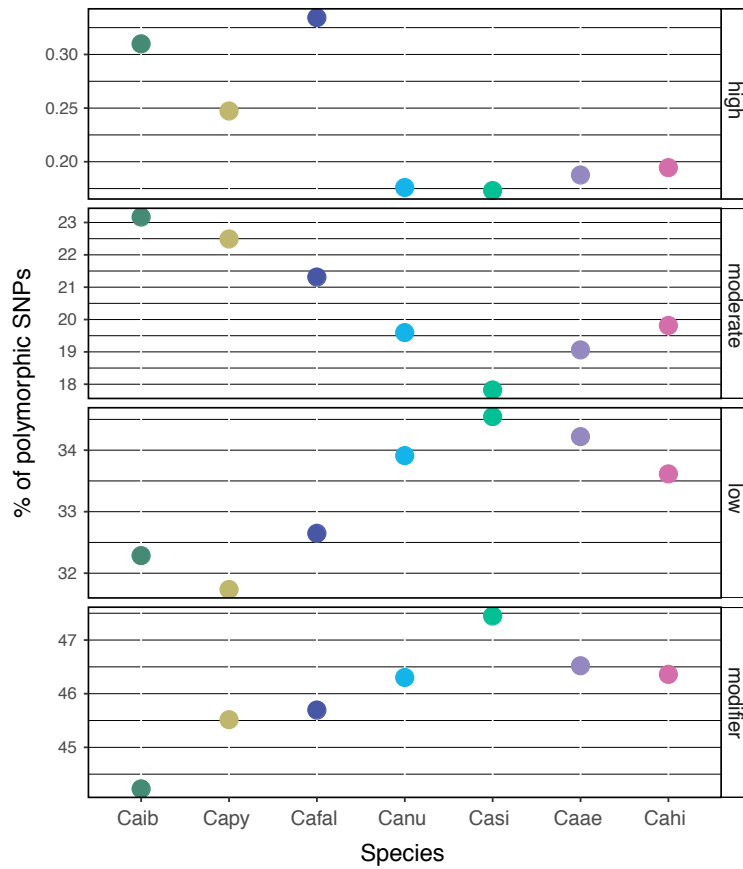

**Supplementary Figure 7A: Deleterious mutations in ibex species (SnpEff analyses).** Proportion of single nucleotide polymorphisms (SNPs) polymorphic within species categorized into four impact categories according to SnpEff (high, moderate, low, modifier). Caib: *Capra ibex*, Capy: *C. pyrenaica*, Cafal: *C. falconeri*, Canu: *C. nubiana*, Casi: *C. sibirica*, Caae: *C. aegagrus*, Cah1: *C. hircus*.

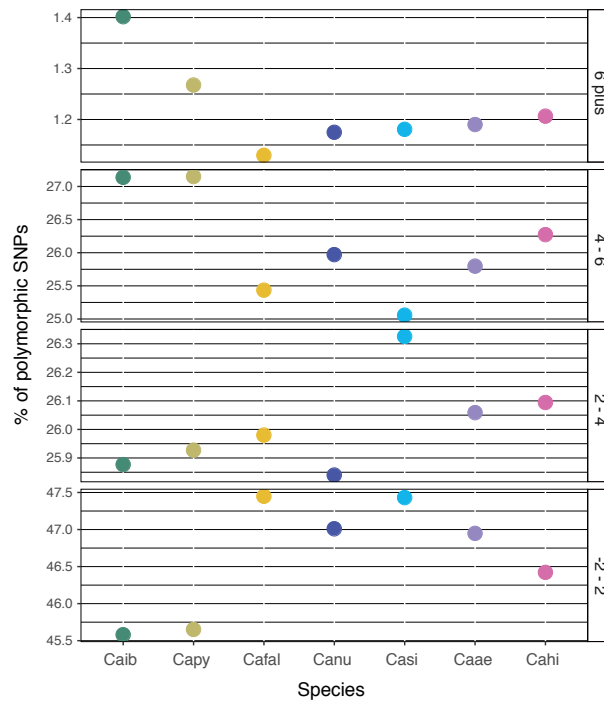

**Supplementary Figure 7B: Deleterious mutations in ibex species (GERP score analyses).** Proportion of single nucleotide polymorphisms (SNPs) polymorphic within species categorized into GERP score ranges (>6, 4 - 6, 2 - 4, -2 - 2). Caib: *Capra ibex*, Capy: *C. pyrenaica*, Cafal: *C. falconeri*, Canu: *C. nubiana*, Casi: *C. sibirica*, Caae: *C. aegagrus*, Cah1: *C. hircus*.

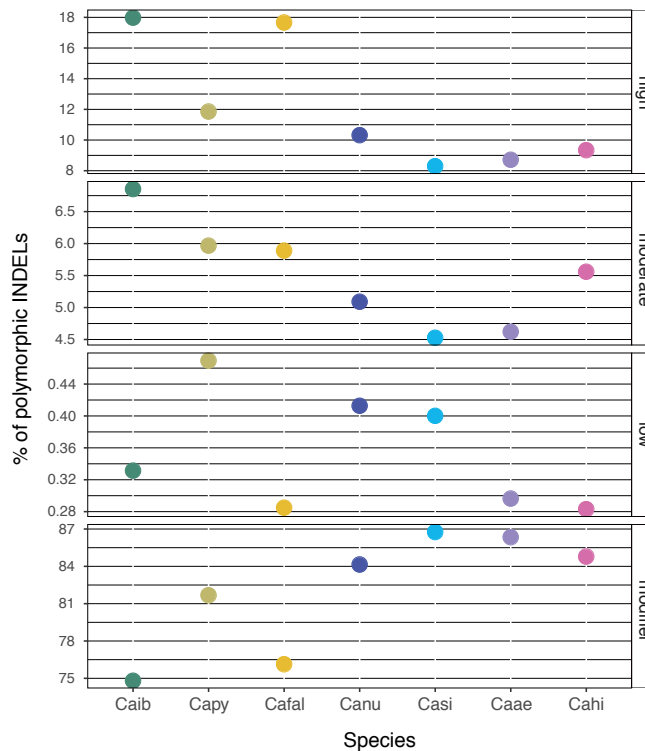

**Supplementary Figure 7C: Deleterious mutations in ibex species (indel analyses based on SnpEff).** Proportion of indels ( $\leq 10$  bp) polymorphic within species categorized into four impact categories according to SnpEff (high, moderate, low, modifier). Caib: *Capra ibex*, Capy: *C. pyrenaica*, Cafal: *C. falconeri*, Canu: *C. nubiana*, Casi: *C. sibirica*, Caae: *C. aegagrus*, Cah1: *C. hircus*.

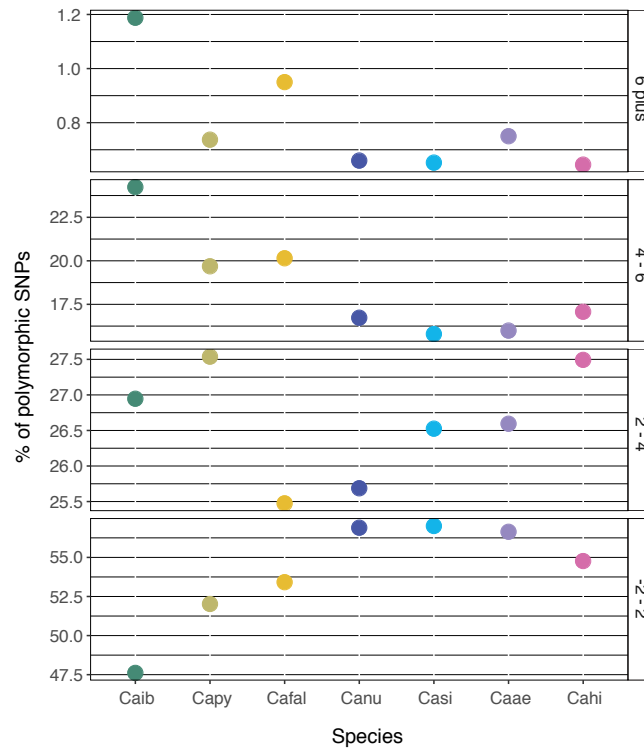

**Supplementary Figure 7D: Deleterious mutations in ibex species (indel analyses based on GERP scores).** Proportion of variant indels (up to 10 bp long) polymorphic within species categorized into GERP score ranges (>6, 4 - 6, 2 - 4, -2 - 2). Caib: *Capra ibex*, Capy: *C. pyrenaica*, Cafal: *C. falconeri*, Canu: *C. nubiana*, Casi: *C. sibirica*, Caae: *C. aegagrus*, Cah: *C. hircus*.

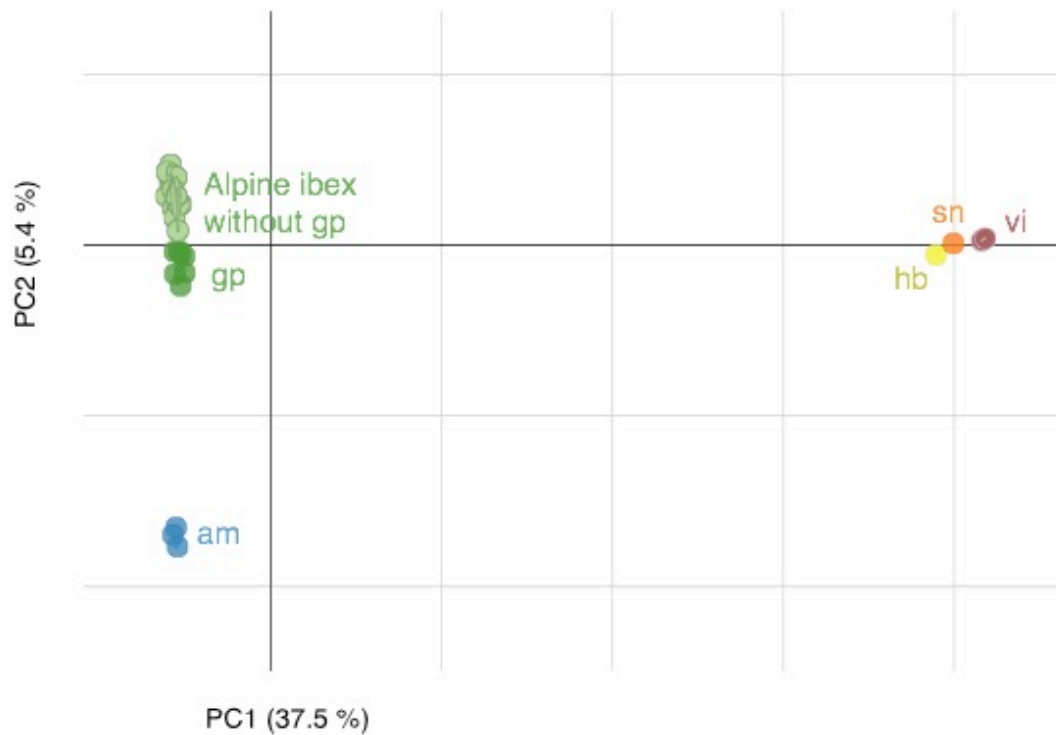

**Supplementary Figure 8: Principal component analyses of Alpine and Iberian ibex.** Alpine ibex: Dark green: Gran Paradiso {gp}, light green: Swiss individuals, blue: Alpi Marittime {am}. Iberian ibex: yellow: Maestrazgo {hb}, orange: Sierra Nevada {sn}, brown: Victoriae {vi}.

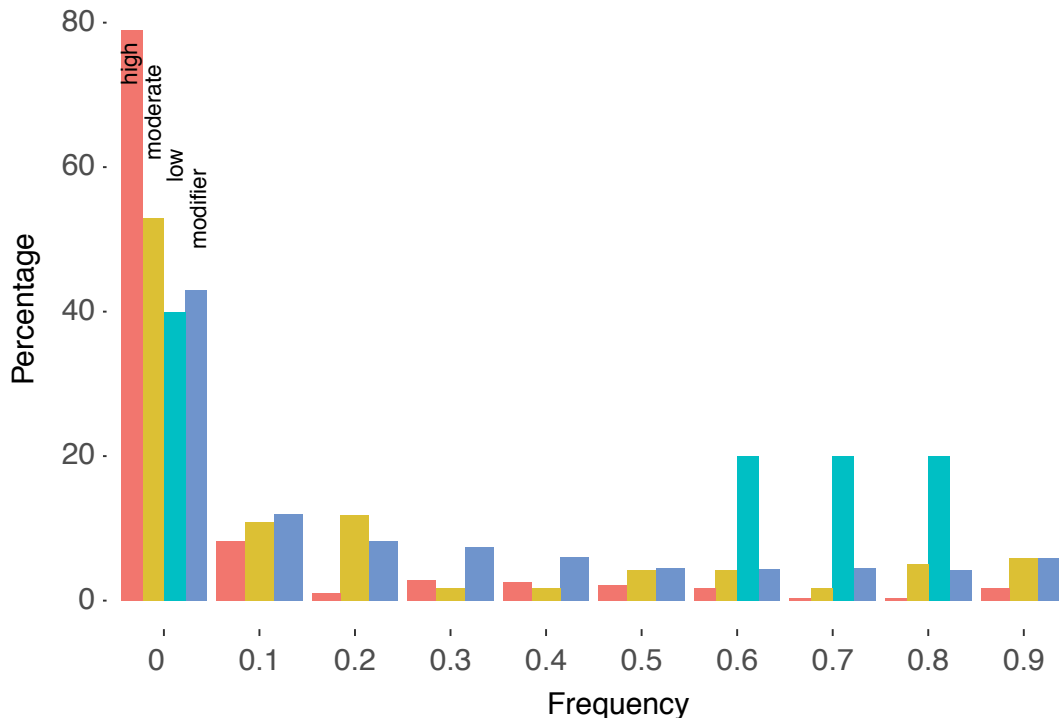

**Supplementary Figure 9: Site-frequency spectrum (SFS) of different SnpEff categories.** Indel mutations in Alpine ibex.

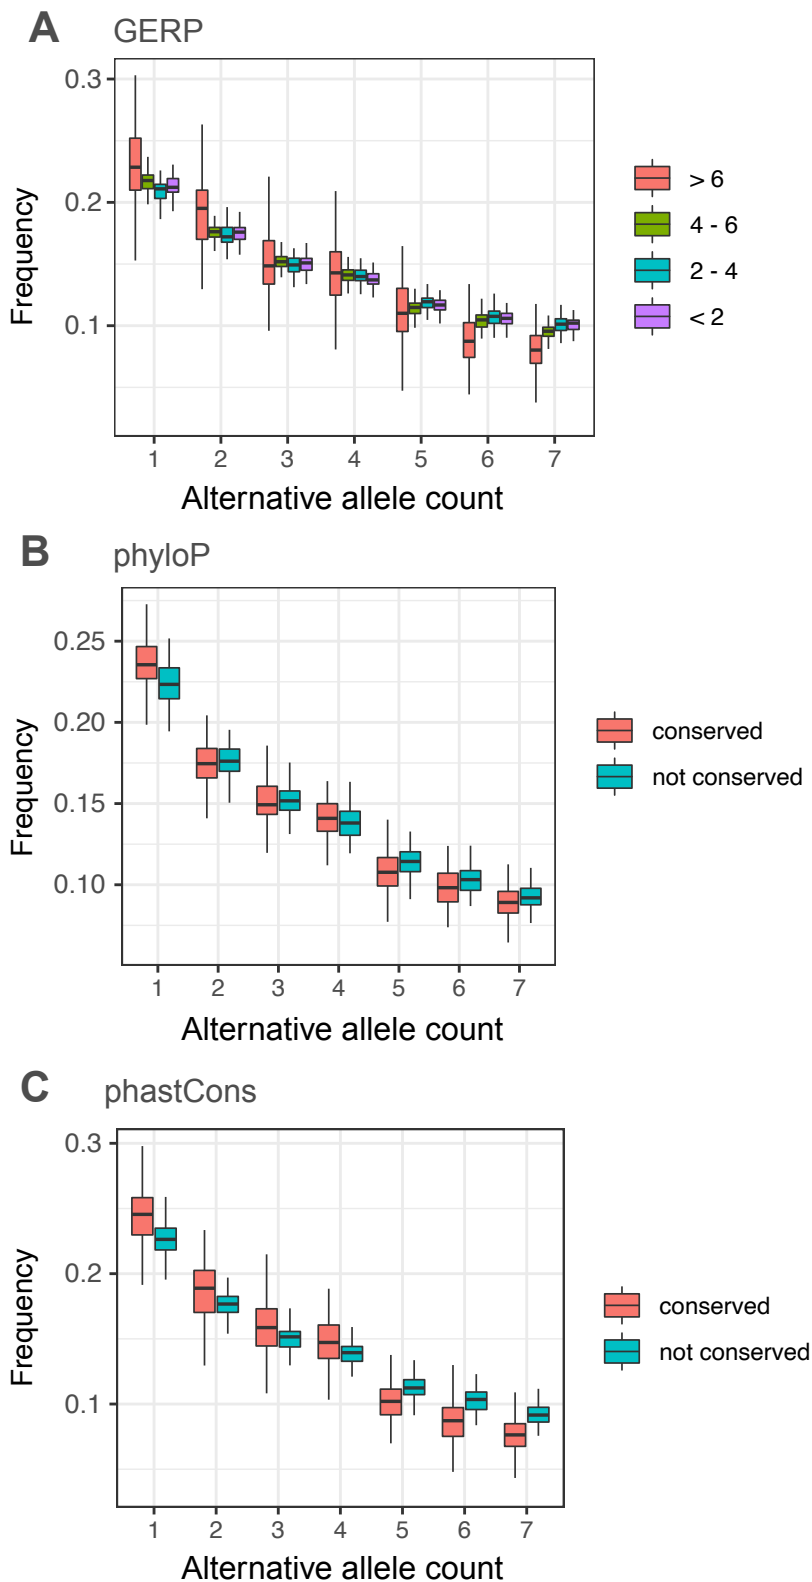

**Supplementary Figure 10: Site-frequency spectra (SFS) in Alpine ibex.** Categorization of SNPs based on A) GERP scores divided into four ranges, B) phyloP scores (conserved:  $> 1$ , not conserved:  $\leq 1$ ) and C) phastCons scores (conserved:  $=1$ , not conserved:  $< 1$ ). See Figure 2 for the SFS of SNPs categorized into SnpEff categories high, moderate, low and modifier. Box plot elements as in Supplementary Figure 2A.

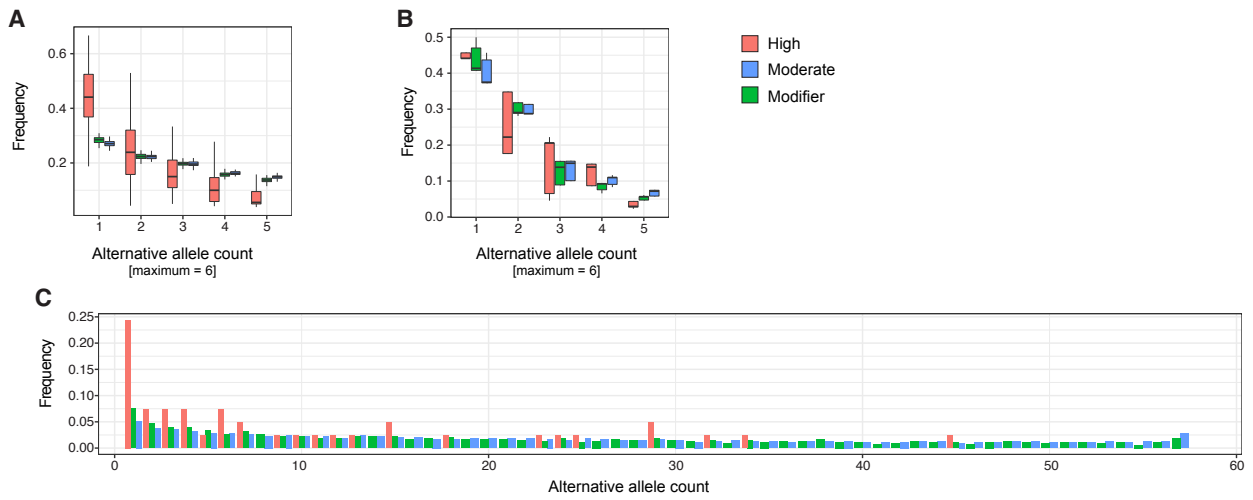

**Supplementary Figure 11: Site frequency spectra (SFS) for different categories of SNP mutations.** Categories are based on SnpEff (high, moderate and modifier categories). A) SFS downsampled to three Alpine ibex individuals based on jackknifing (100 replicates). B) SFS downsampled to three Iberian ibex individuals based on jackknifing (100 replicates). C) SFS for all Alpine ibex without grouping (see also Figure 2B). Box plot elements as in Supplementary Figure 2A.

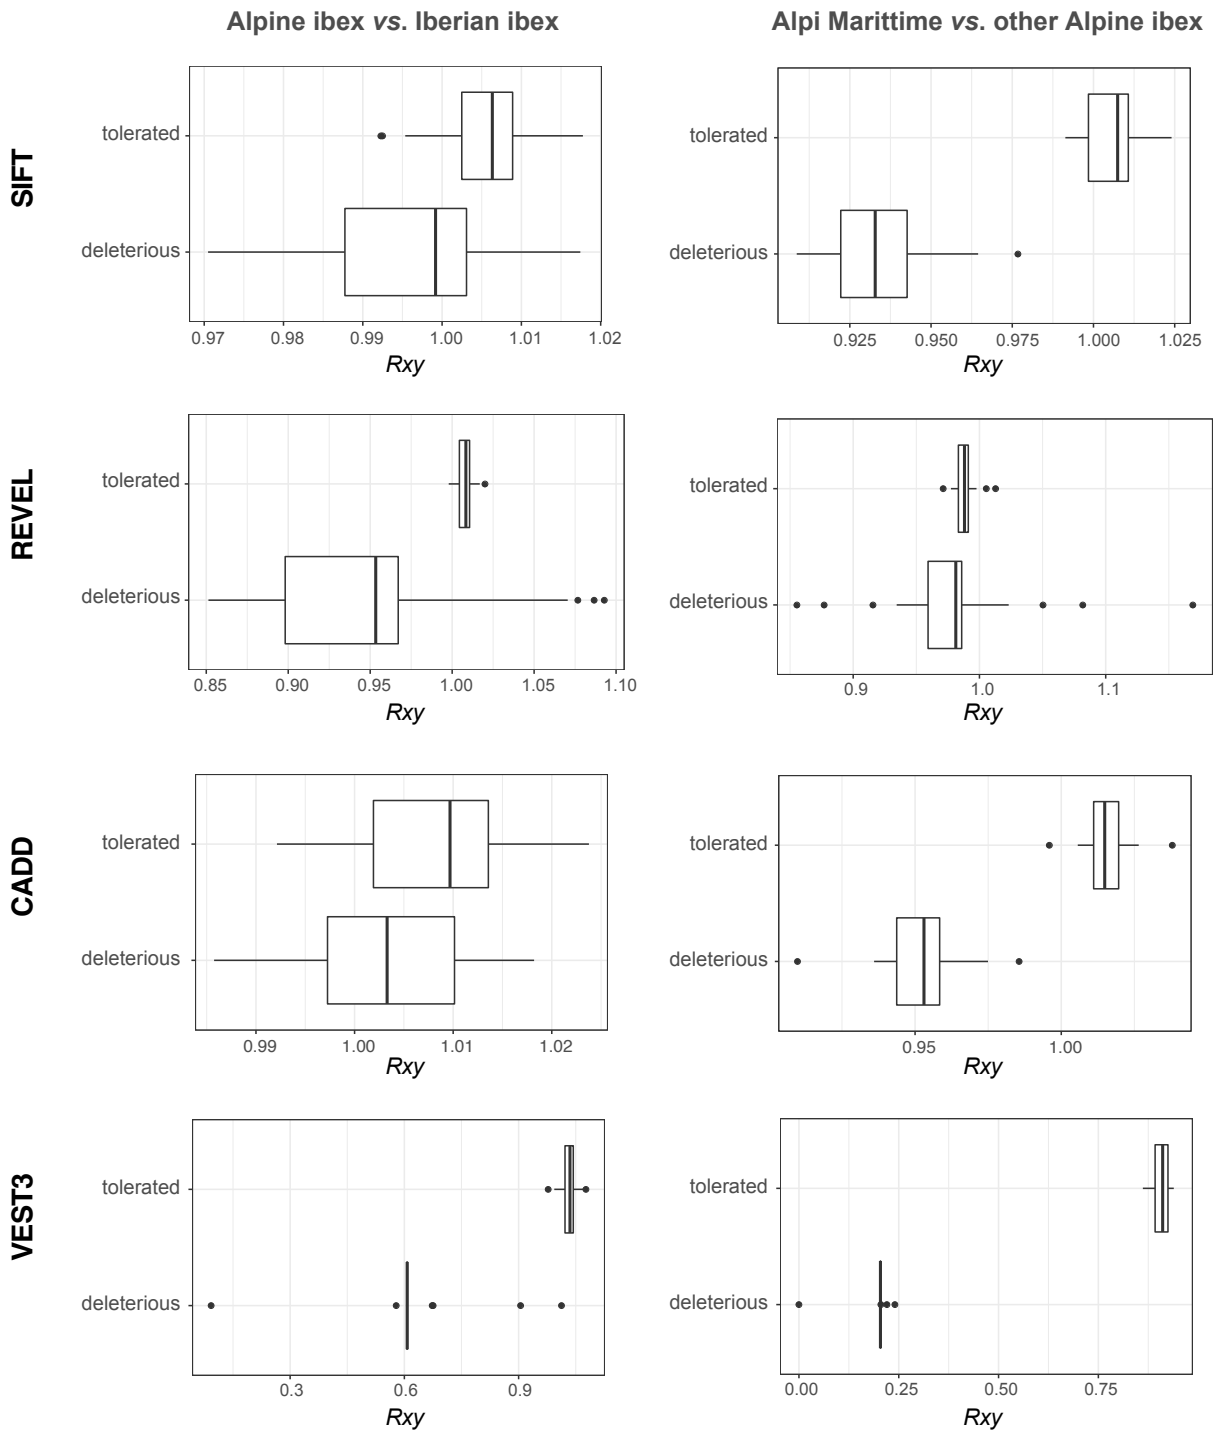

**Supplementary Figure 12:  $R_{xy}$  analysis.** Analyses were performed based on four additional mutation scoring methods (SIFT, Revel, CADD, VEST3).  $R_{xy} < 1$  indicates a relative frequency deficit of the corresponding category in Alpine ibex compared to Iberian ibex (left column) or Alpi Marittime compared to other Alpine ibex (right column).  $R_{xy}$  distributions are based on jack-knifing across chromosomes. Score cut-offs used to define deleteriousness were as follows: Revel: 0.75, CADD: 20, SIFT: 0.05, VEST3: 0.91 (99%-percentile). See methods for details. Box plot elements as in Supplementary Figure 2A.

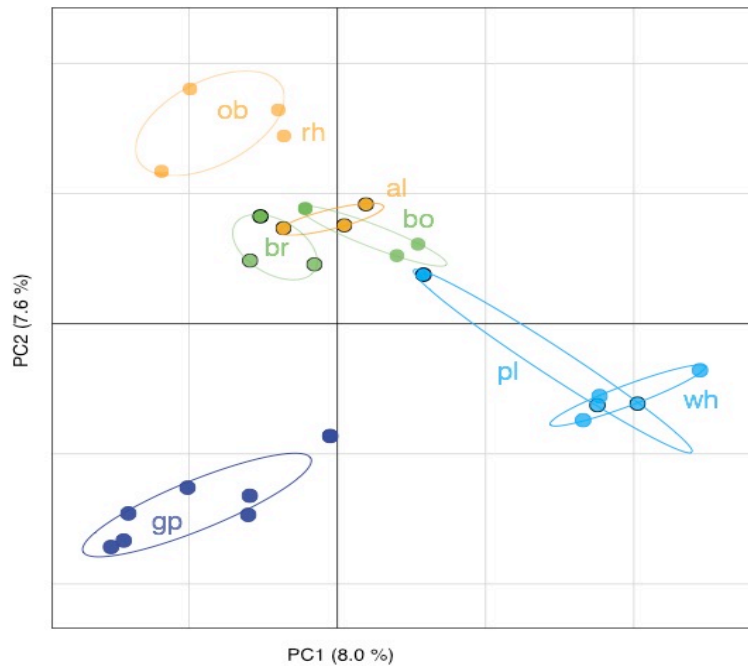

**Supplementary Figure 13A: Principal component analysis plot of Alpine ibex.** All individuals are included except the individuals from the highly divergent population Alpi Marittime. Circles with black rim indicate the three populations used for all further population reintroductions of Alpine ibex. Same colors of Alpine ibex populations join founder and descendent population. bo, Bire Öschinen; gp, Gran Paradiso; al, Albris; br, Brienzer Rothorn; ob, Oberbauenstock; pl, Pleureur; rh, Rheinwald; wh, Weisshorn.

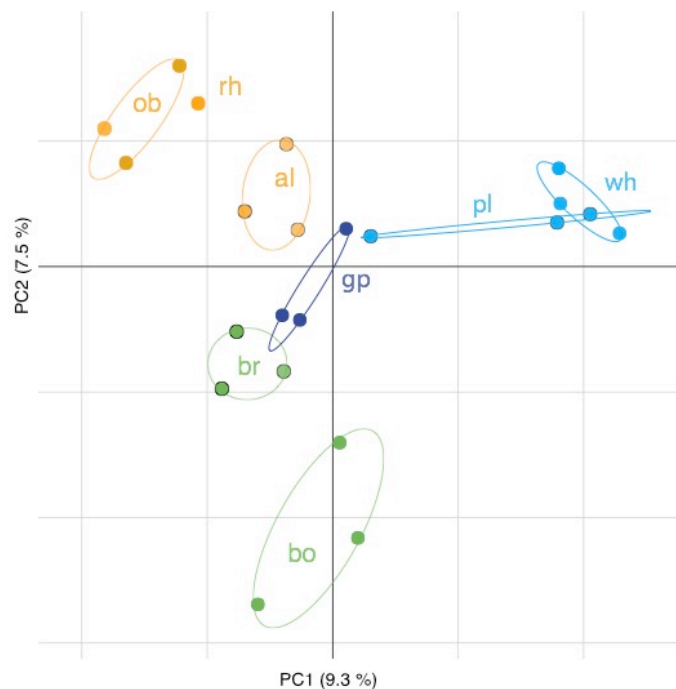

**Supplementary Figure 13B: Principal component analysis plot of Alpine ibex.** Excluded are the individuals from the highly divergent population Alpi Marittime. The population from Gran Paradiso was reduced to three randomly chosen individuals. bo, Bire Öschinen; gp, Gran Paradiso; al, Albris; br, Brienzer Rothorn; ob, Oberbauenstock; pl, Pleureur; rh, Rheinwald; wh, Weisshorn.



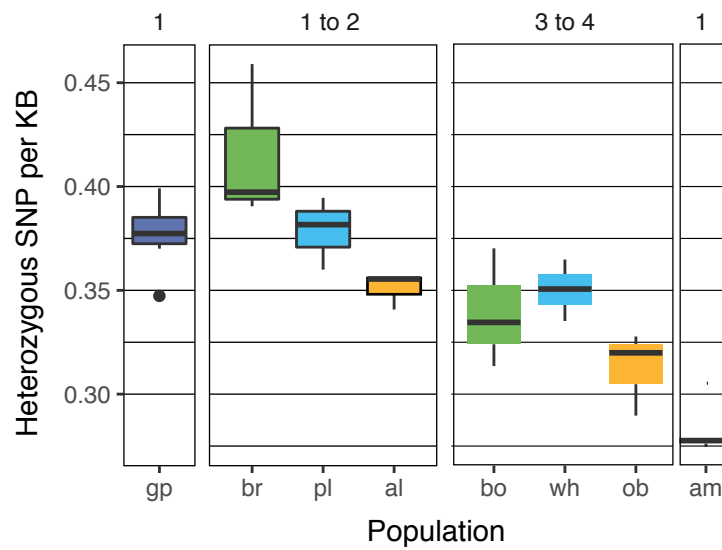

**Supplementary Figure 14: Genome-wide heterozygosity per Alpine ibex population.** Heterozygosity is expressed as the number of heterozygous, autosomal SNPs per kb. Colors as in Figures 3 and S11. bo, Bire Öschinen; gp, Gran Paradiso; al, Albris; br, Brienzer Rothorn; ob, Oberbauenstock; pl, Pleureur; rh, Rheinwald; wh, Weisshorn. Numbers above panels indicate the number of bottlenecks the corresponding populations underwent during the reintroductions. Box plot elements as in Supplementary Figure 2A.

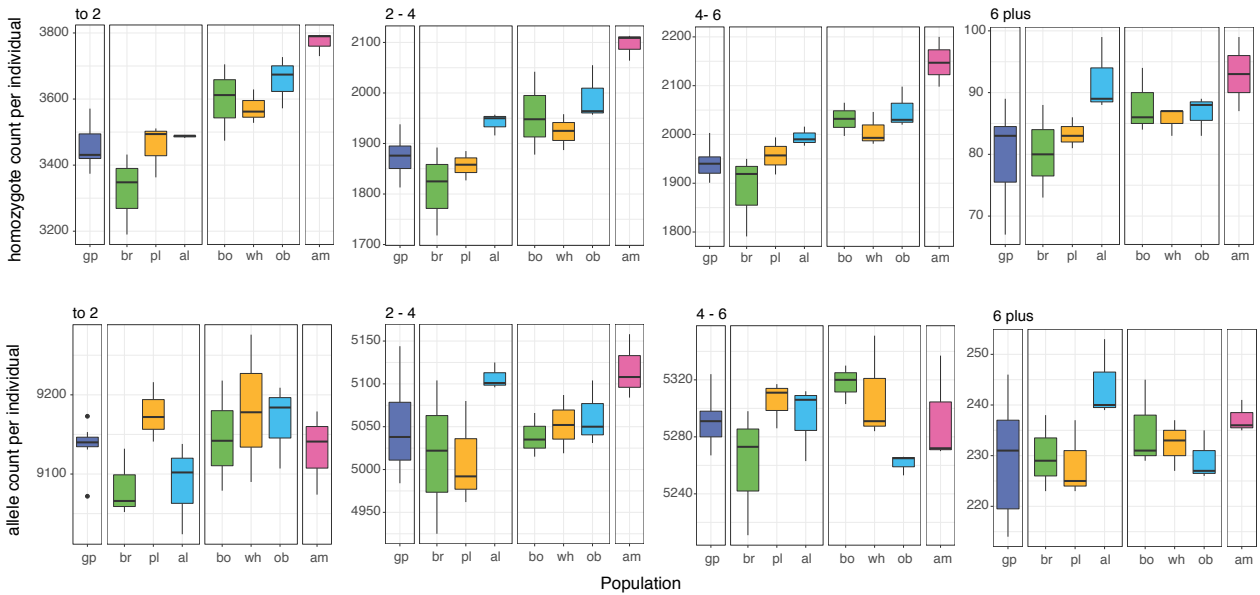

**Supplementary Figure 15: Individual mutation load.** Individual homozygote counts (upper panel) and allele counts (lower panel) for each Alpine ibex population. Left to right shows GERP score ranges of -2 - 2, 2 - 4, 4 - 6 and >6 of SNP mutations. Colors group Alpine ibex populations into founder and descendent population pairs (see Figure 3). Box plot elements as in Supplementary Figure 2A.

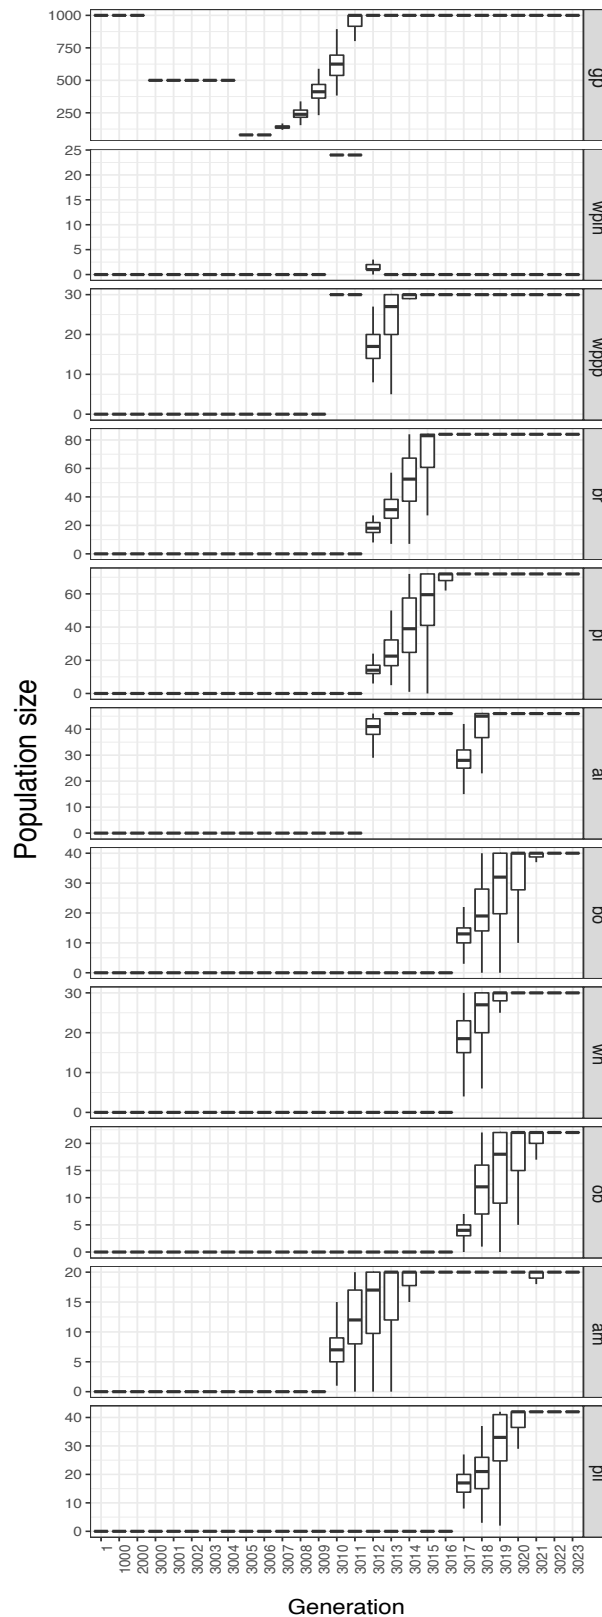

**Supplementary Figure 16: Population size changes over the course of the demographic simulations.** Population size did not change between generation 1 and 2999. am: Alpi Marittime, gp: Gran Paradiso; ih: Zoo Interlaken Harder; al: Albris; bo: Bire Öschinen; br: Brienzer Rothorn; ob: Oberbauenstock; pl: Pleureur; rh: Rheinwald; wh: Weisshorn; pil: Pilatus; wpih: Wildpark Interlaken Harder; wppp: Wildpark Peter and Paul. Box plot elements as in Supplementary Figure 2A.

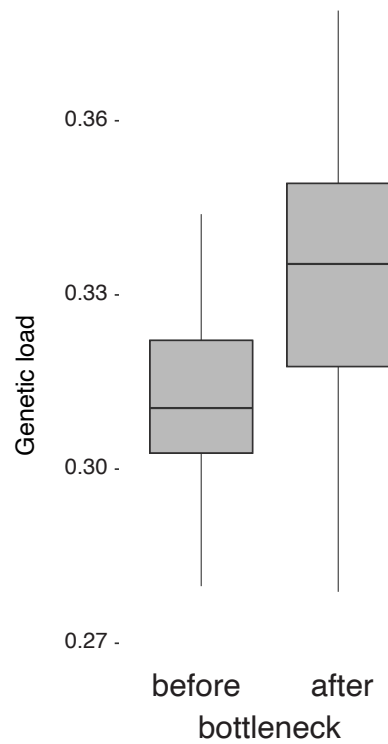

**Supplementary Figure 17: Realized genetic load before and after simulated bottleneck.** Boxplots showing genetic load before and after the simulated species bottleneck in Alpine ibex. Genetic load was defined as mean individual fitness of females. Box plot elements as in Supplementary Figure 2A.

Before species bottleneck

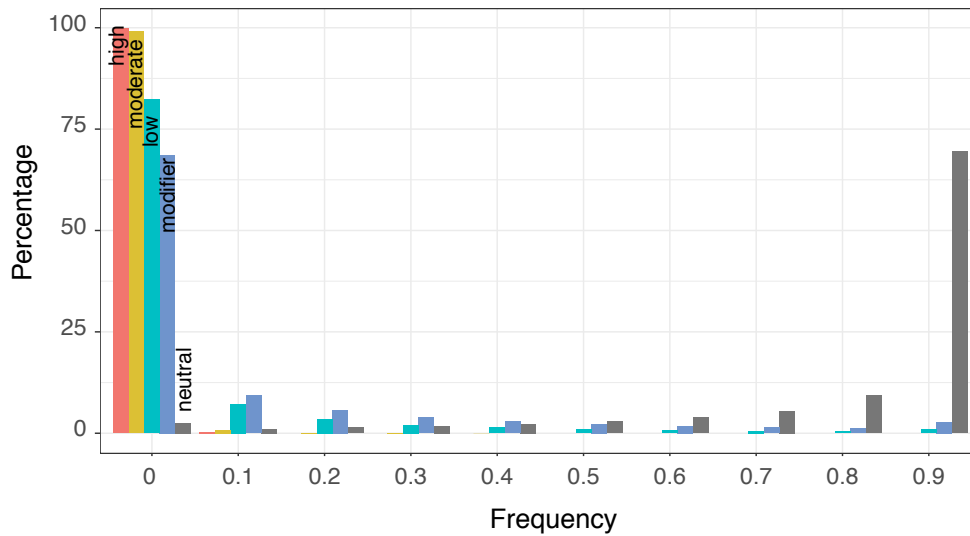

After species bottleneck

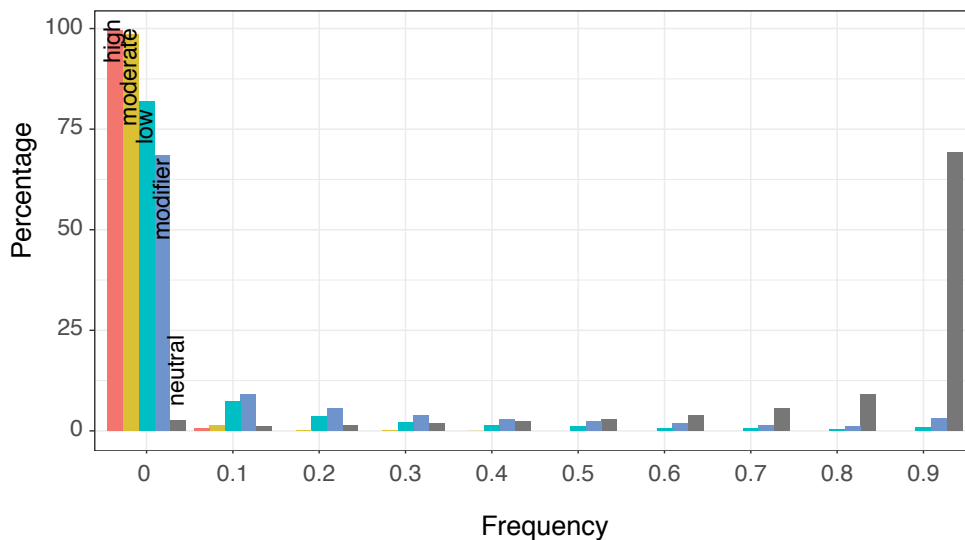

**Supplementary Figure 18: Site-frequency spectra before and after simulated bottleneck.** Shown are SFS for different mutation categories (neutral, modifier, low, moderate, high). Deleterious mutation categories were defined based on the selection coefficient  $s$  as follows: Modifier:  $s < 0.0001$ , Low:  $0.0001 \leq s < 0.01$ , Moderate:  $0.01 \leq s < 0.1$ , High:  $0.1 \leq s$ . The bottleneck occurred between generations 2999 and 3023.

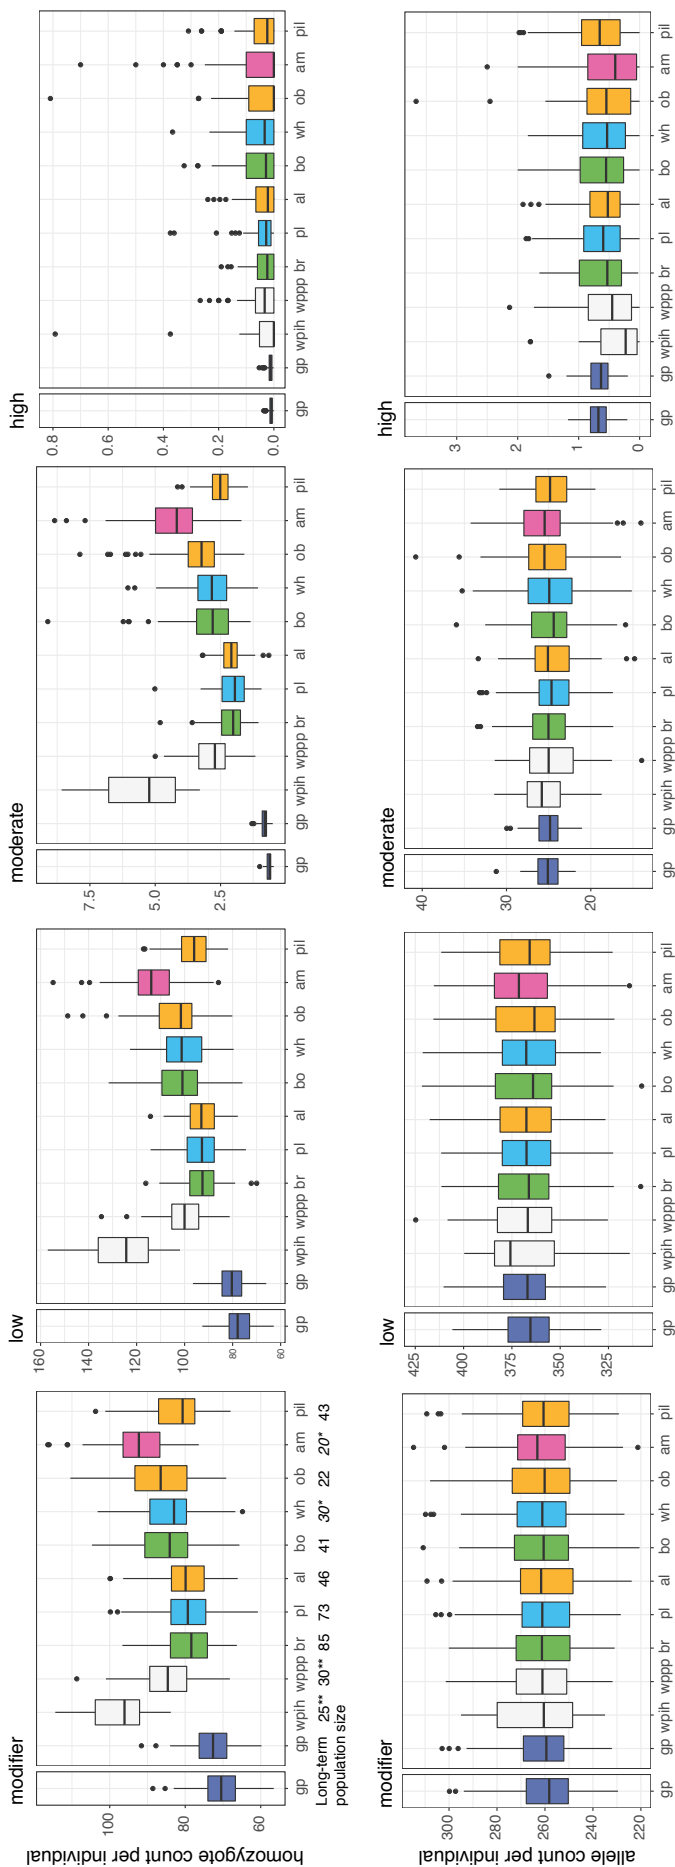

**Supplementary Figure 19: Individual genetic load per simulated population.** Outcome of the demographic simulations showing individual homozygote and allele counts grouped by population. Simulated populations included all major wild parks and populations that contributed to the founding of the Alpine ibex populations under study (see also Figure 3A). Matching colours group source populations with populations that were founded from them (except for wpih, wppp, gp and am). Deleterious mutation categories were defined based on the selection coefficient  $s$  as follows: Modifier:  $s < 0.0001$ , Low:  $0.0001 \leq s < 0.01$ , Moderate:  $0.01 \leq s < 0.1$ , High:  $0.1 \leq s$ . Abbreviations: gp: Gran Paradiso, wpih: Wildpark Interlaken Harder, wppp: Wildpark Peter and Paul, br: Briener Rothorn, pl: Pleureur, al: Albris, bo: Bire Oeschinen, wh: Weisshorn, ob: Oberbauenstock, am: Alpi Marittime, pil: Pilatus. Box plot elements as in Supplementary Figure 2A.

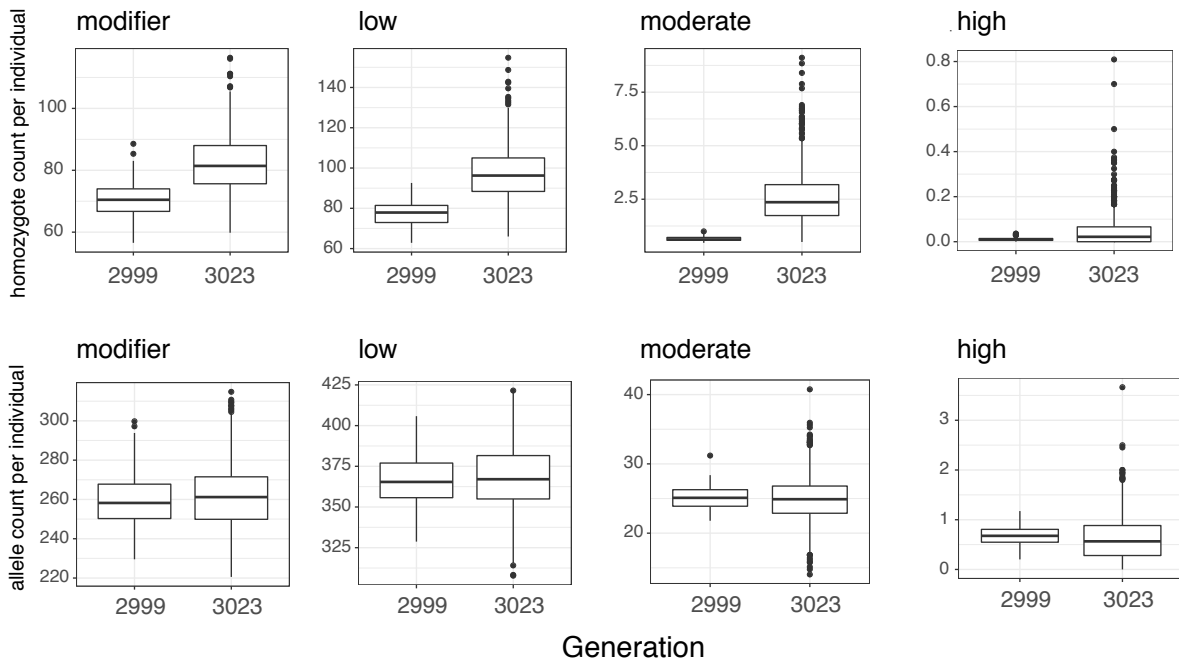

**Supplementary Figure 20: Individual genetic mutation load before and after simulated bottlenecks.** Outcome of the demographic simulations showing individual homozygote and allele counts before and after the species bottleneck (generations 2999 and 3023, respectively). Deleterious mutation categories were defined based on the selection coefficient  $s$  as follows: Modifier:  $s < 0.0001$ , Low:  $0.0001 \leq s < 0.01$ , Moderate:  $0.01 \leq s < 0.1$ , High:  $0.1 \leq s$ . Box plot elements as in Supplementary Figure 2A.

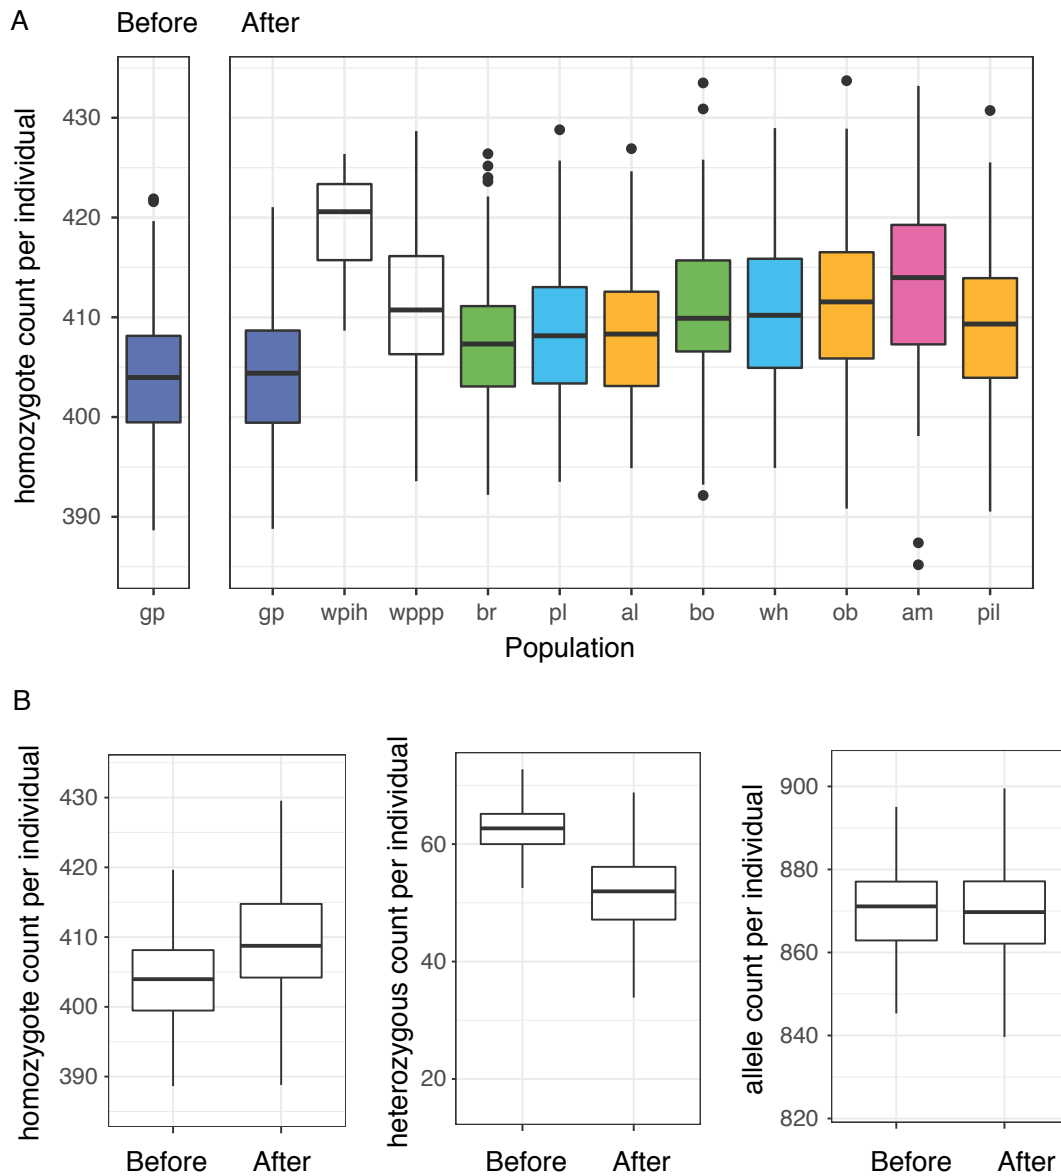

**Supplementary Figure 21: Outcome of the demographic simulations at neutral sites.** A) Homozygote count for derived neutral alleles before and after the species bottleneck (generations 2999 and 3023, respectively). Simulated populations included all major wild parks and populations that contributed to the founding of the Alpine ibex populations under study (see also Figure 3A). Matching colours group source populations with populations that were founded from them (except for wpih, wppp, gp and am). Abbreviations: gp: Gran Paradiso, wpih: Wildpark Interlaken Harder, wppp: Wildpark Peter and Paul, br: Brienzer Rothorn, pl: Pleureur, al: Albris, bo: Bire Oeschinen, wh: Weisshorn, ob: Oberbauenstock, am: Alpi Marittime, pil: Pilatus. B) Homozygote and heterozygote counts, and allele count per individual of derived neutral alleles before and after the species bottleneck. The category “after” includes all populations for which genomic data was generated with the exception of the wild parks and the Pilatus (pil) population. Box plot elements as in Supplementary Figure 2A.



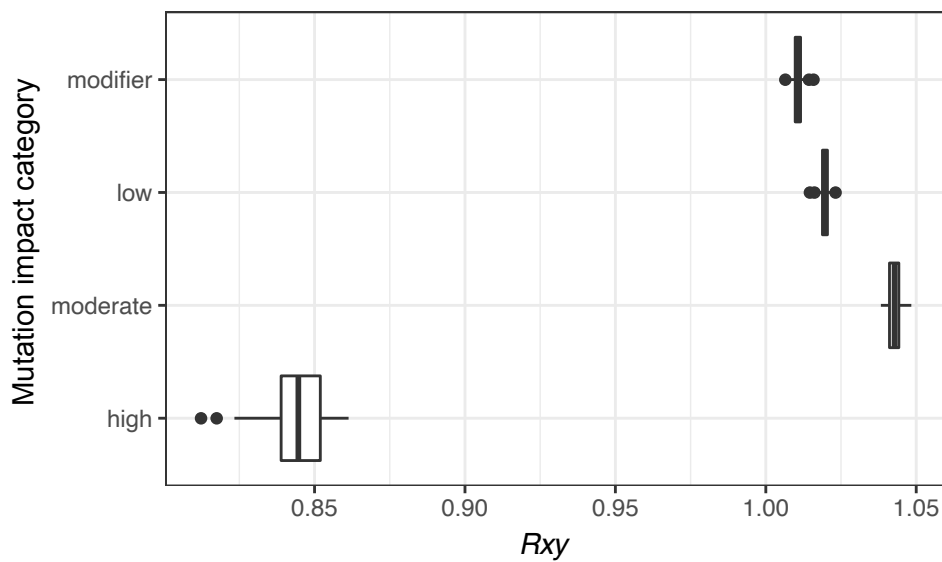

**Supplementary Figure 22:  $R_{xy}$  analysis of Alpi Marittimo versus Gran Paradiso.**  $R_{xy}$  analysis contrasting the strongly bottlenecked Alpi Marittimo population with the Gran Paradiso population across the spectrum of SnpEff impact categories. Box plot elements as in Supplementary Figure 2A.

**Supplementary Figures 23 – 31: Visualization of SNP variant quality parameters used for filtering.** The applied cut-offs are shown with a vertical line.

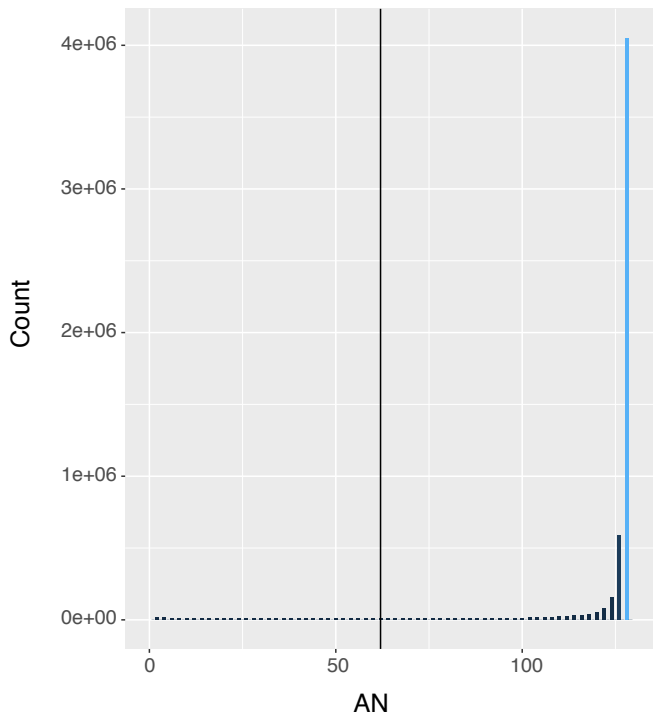

**Supplementary Figure 23: Distribution of the AN statistic.** Number of called alleles (corresponds to twice the number of samples genotyped at the locus).

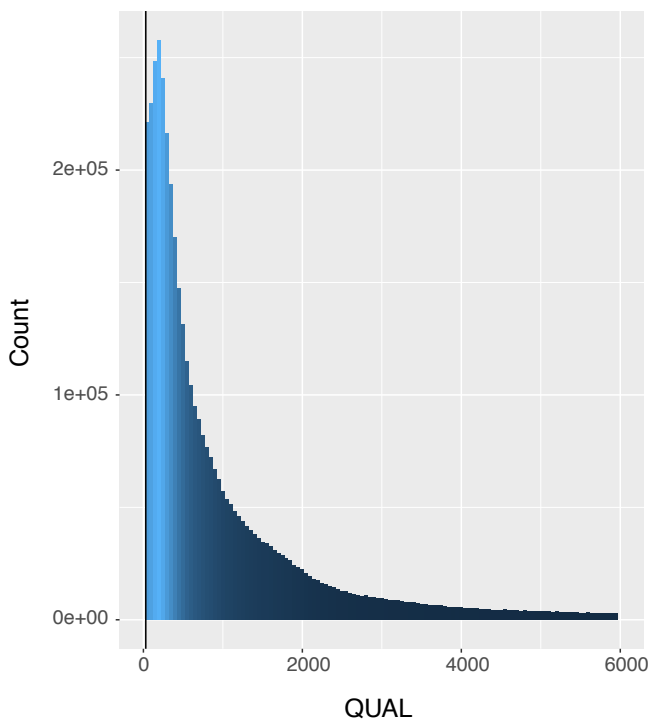

**Supplementary Figure 24: Distribution of the overall SNP quality (QUAL) statistic.**

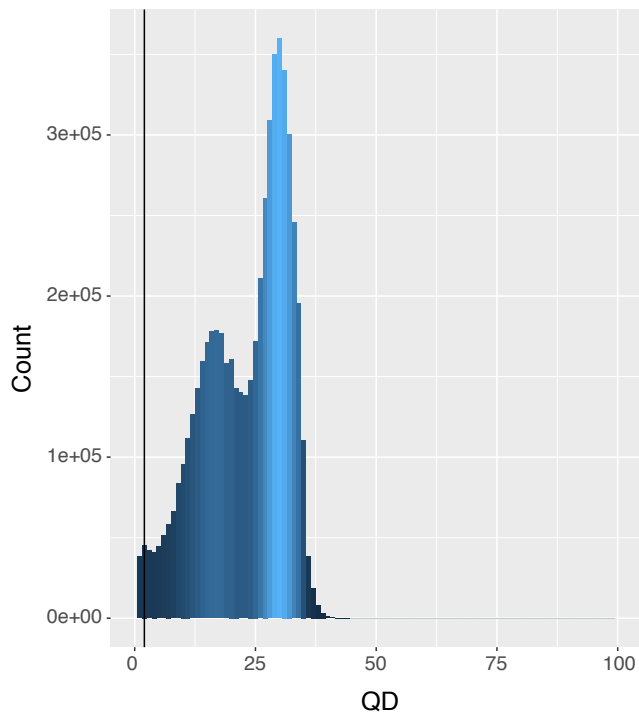

**Supplementary Figure 25: Distribution of the QualByDepth (QD) statistic.** Confidence of the variant quality (QUAL) divided by the unfiltered depth of the samples called as non-reference.

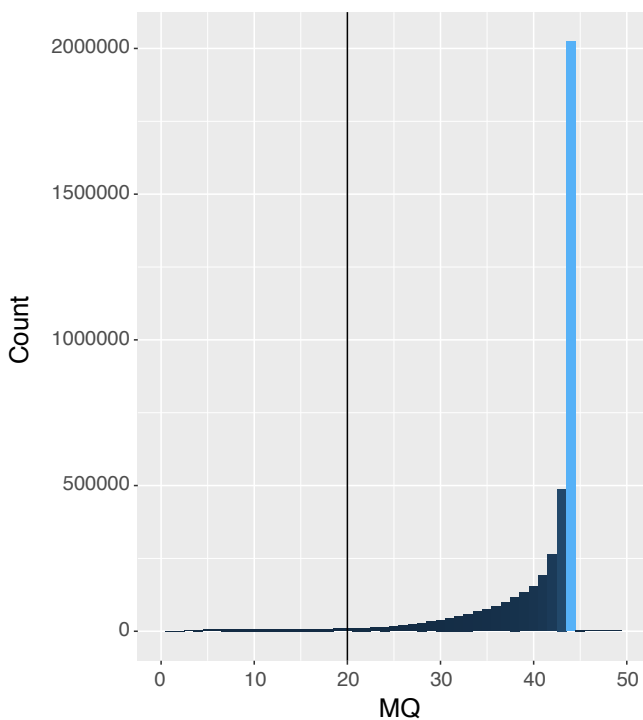

**Supplementary Figure 26: Distribution of the RMSMappingQuality (MQ) statistic.** Root mean square of the mapping quality calculated across all reads from all samples.

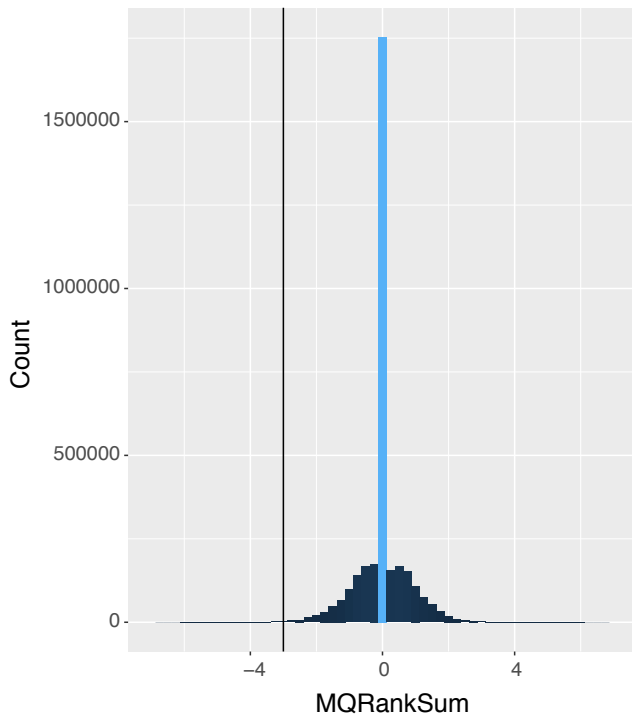

**Supplementary Figure 27: Distribution of the MappingQualityRankSumTest (MQRankSum) statistic.** A test for differences in mapping quality between reference versus alternate allele.

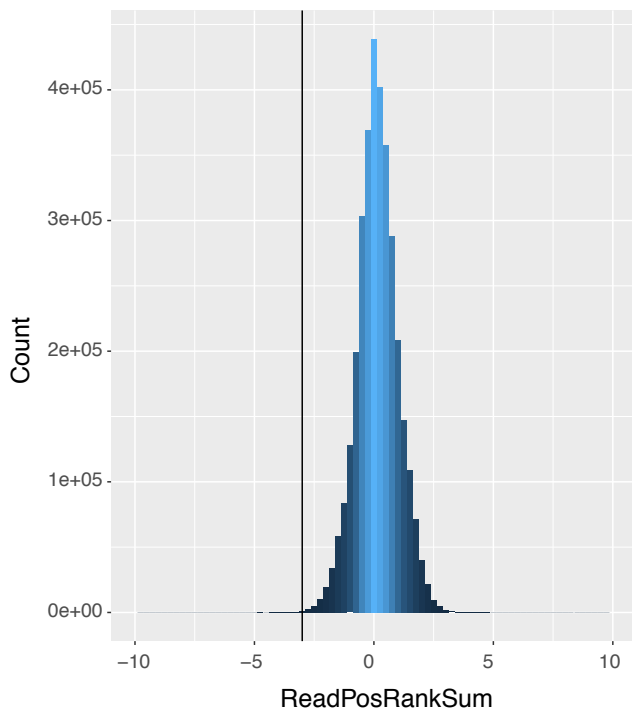

**Supplementary Figure 28: Distribution of the ReadPosRankSumTest statistic.** A test for the even distribution of variants along reads.

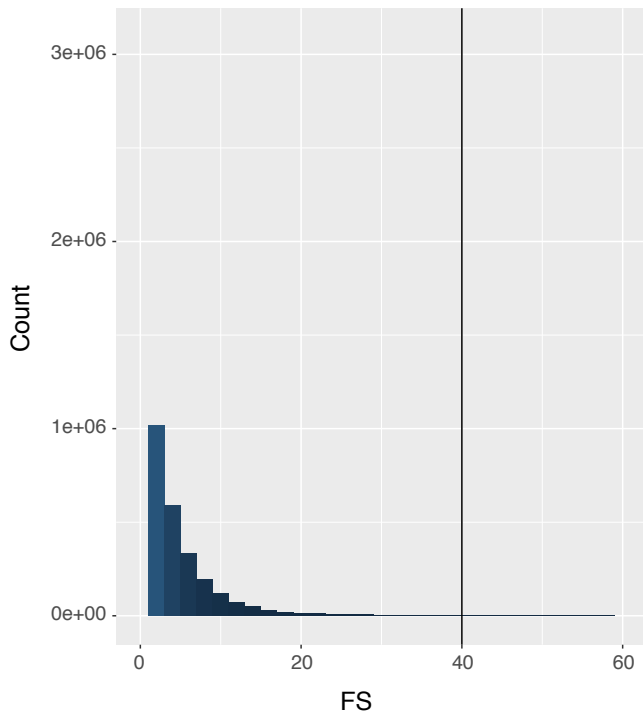

**Supplementary Figure 29: Distribution of the FisherStrand (FS) statistic.** A test for strand bias, i.e. if a variant is predominantly associated with one of the two read strands (forward or reverse).

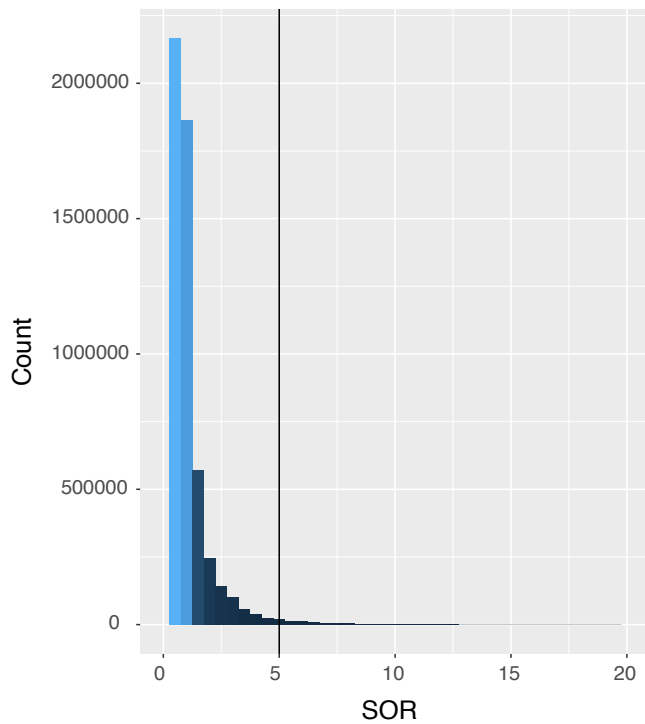

**Supplementary Figure 30: Distribution of the StrandOddsRatio (SOR) statistic.**

Variant filters applied by GATK

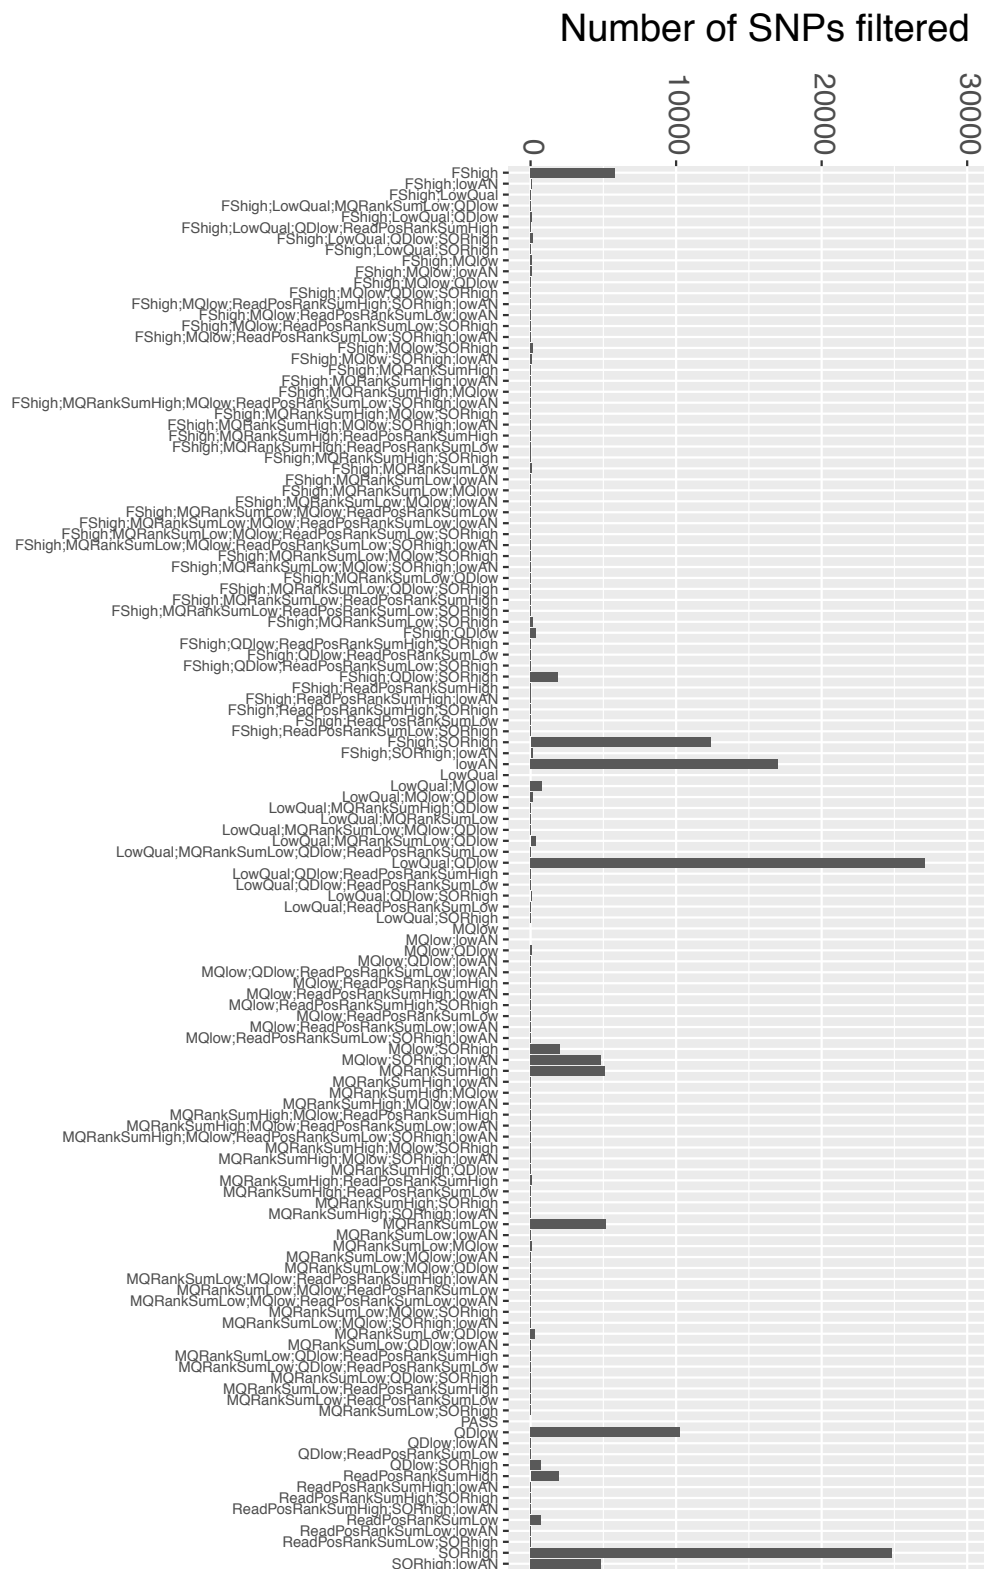

**Supplementary Figure 31: Summary of SNP loci filtering outcome.** Candidate SNP variants filtered out by different filter combinations. See methods for individual filter settings.

**Supplementary Figures 32 - 39: Visualization of indel variant quality parameters used for filtering.** The applied cut-offs are shown with a vertical line.

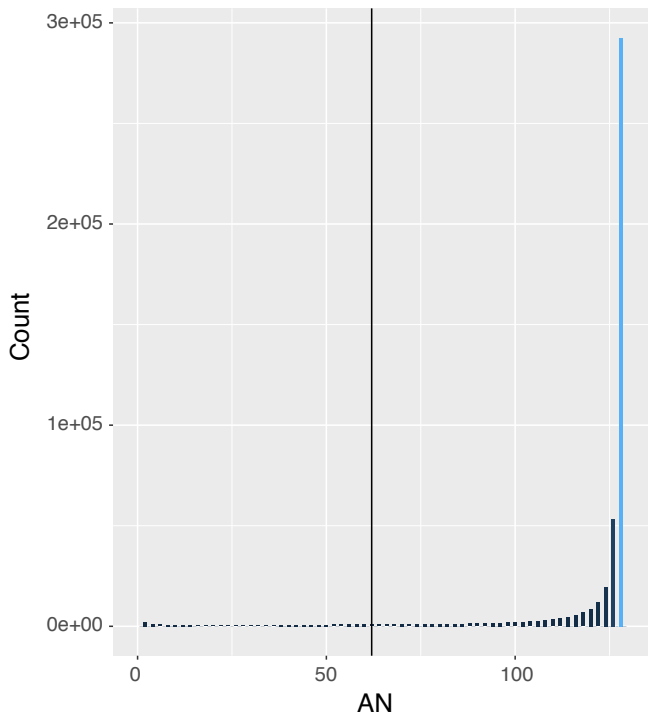

**Supplementary Figure 32: Distribution of the AN statistic (indels).** Number of called alleles (corresponds to twice the number of samples genotyped at the locus).

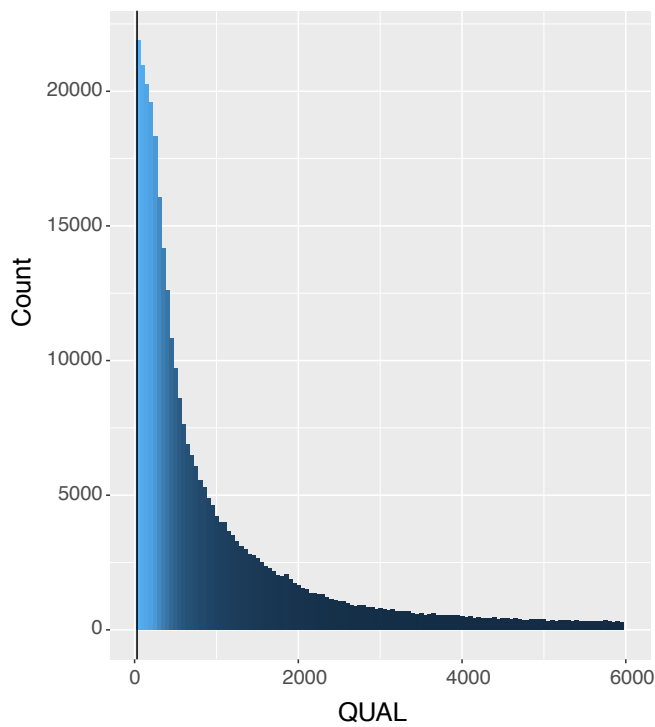

**Supplementary Figure 33: Distribution of the overall indel quality (QUAL) statistic.**

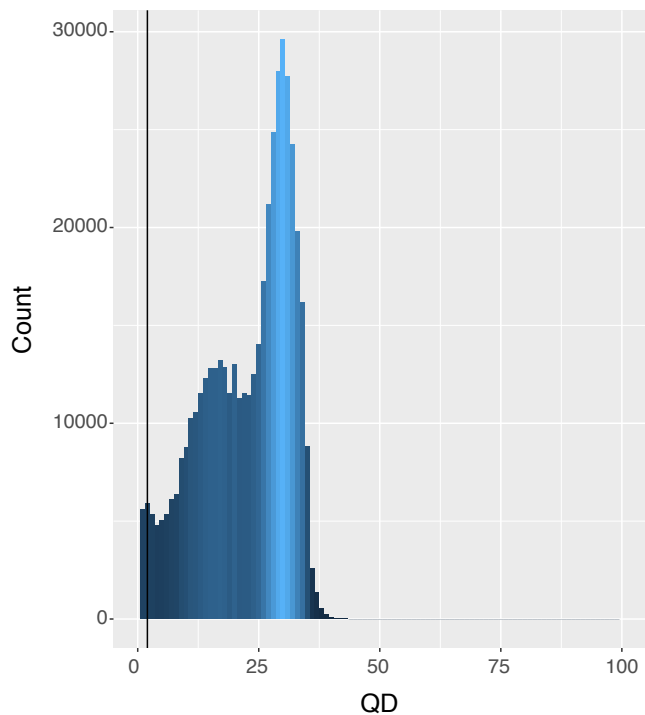

**Supplementary Figure 34: Distribution of the QualByDepth (QD) statistic (indels).** Confidence of the variant quality (QUAL) divided by the unfiltered depth of the samples called as non-reference.

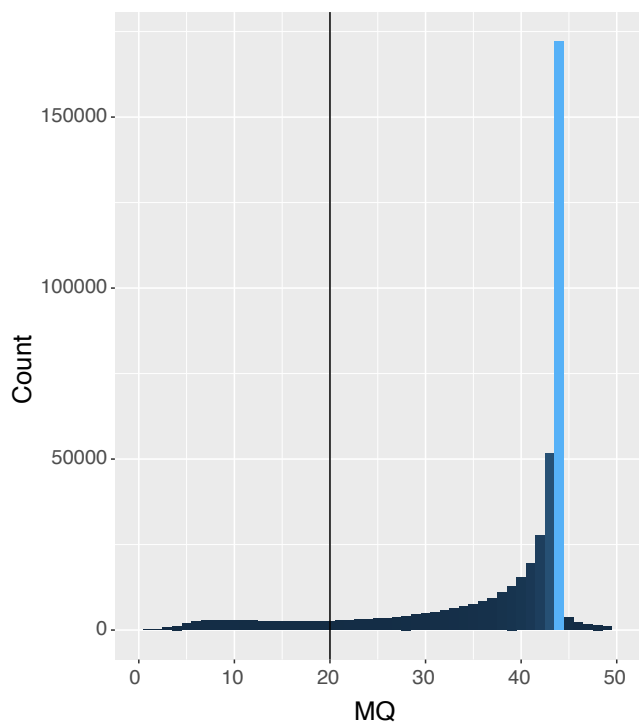

**Supplementary Figure 35: Distribution of the RMSMappingQuality (MQ) statistic (indels).** Root mean square of the mapping quality calculated across all reads from all samples.



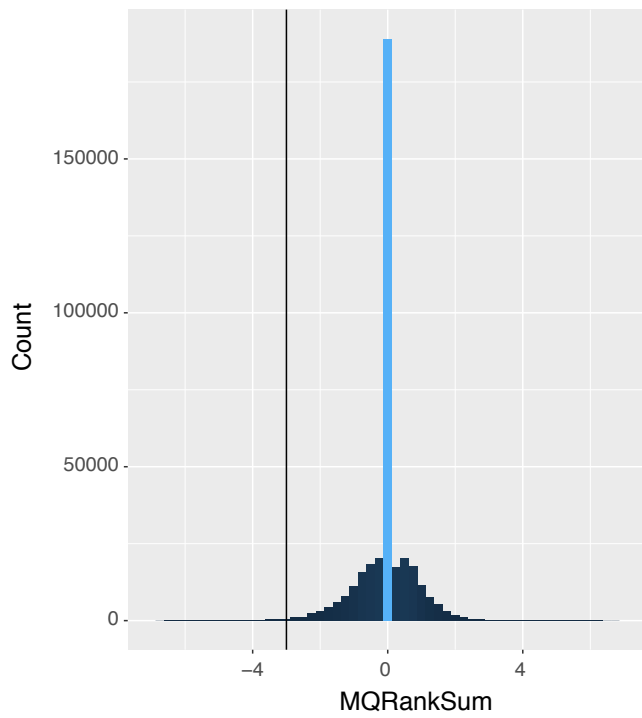

**Supplementary Figure 36: Distribution of the MappingQualityRankSumTest (MQRankSum) statistic (indels).** A test for differences in mapping quality between reference versus alternate allele.

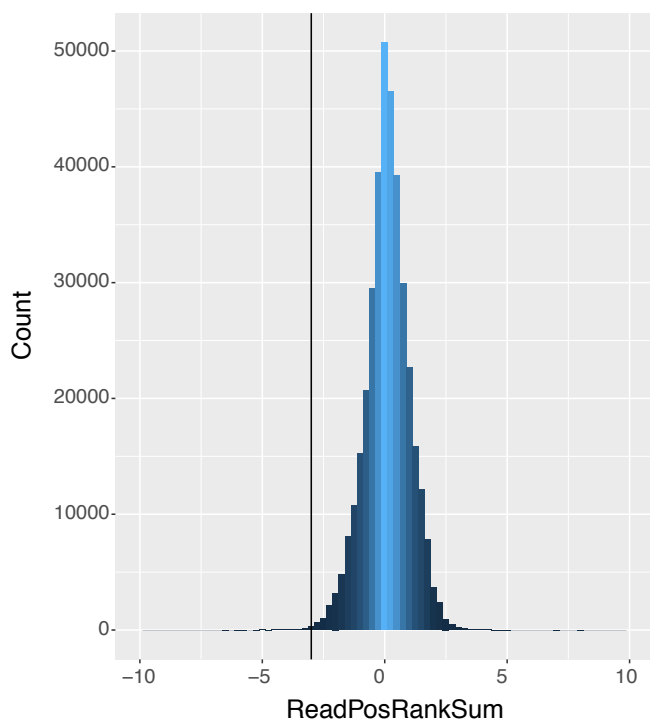

**Supplementary Figure 37: Distribution of the ReadPosRankSumTest statistic (indels).** A test for the even distribution of variants along reads.

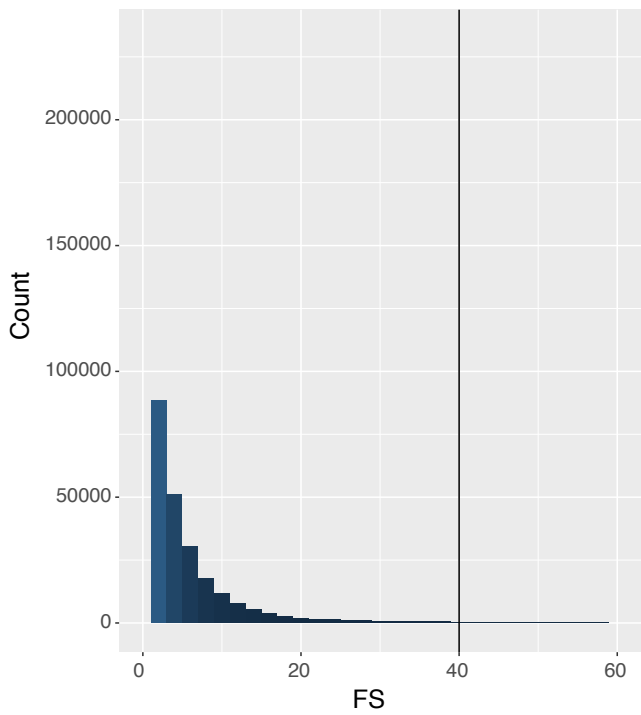

**Supplementary Figure 38: Distribution of the FisherStrand (FS) statistic (indels).** A test for strand bias, i.e. if a variant is predominantly associated with one of the two read strands (forward or reverse).

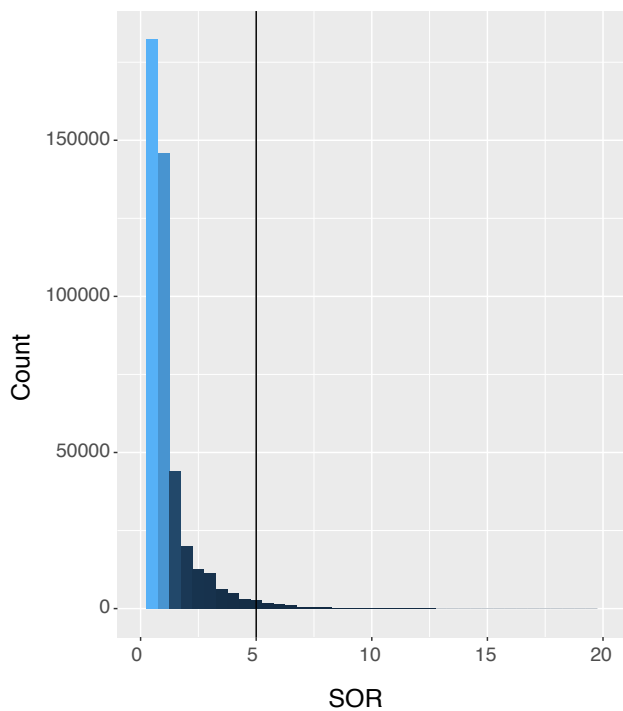

**Supplementary Figure 39: Distribution of the StrandOddsRatio (SOR) statistic (indels).**

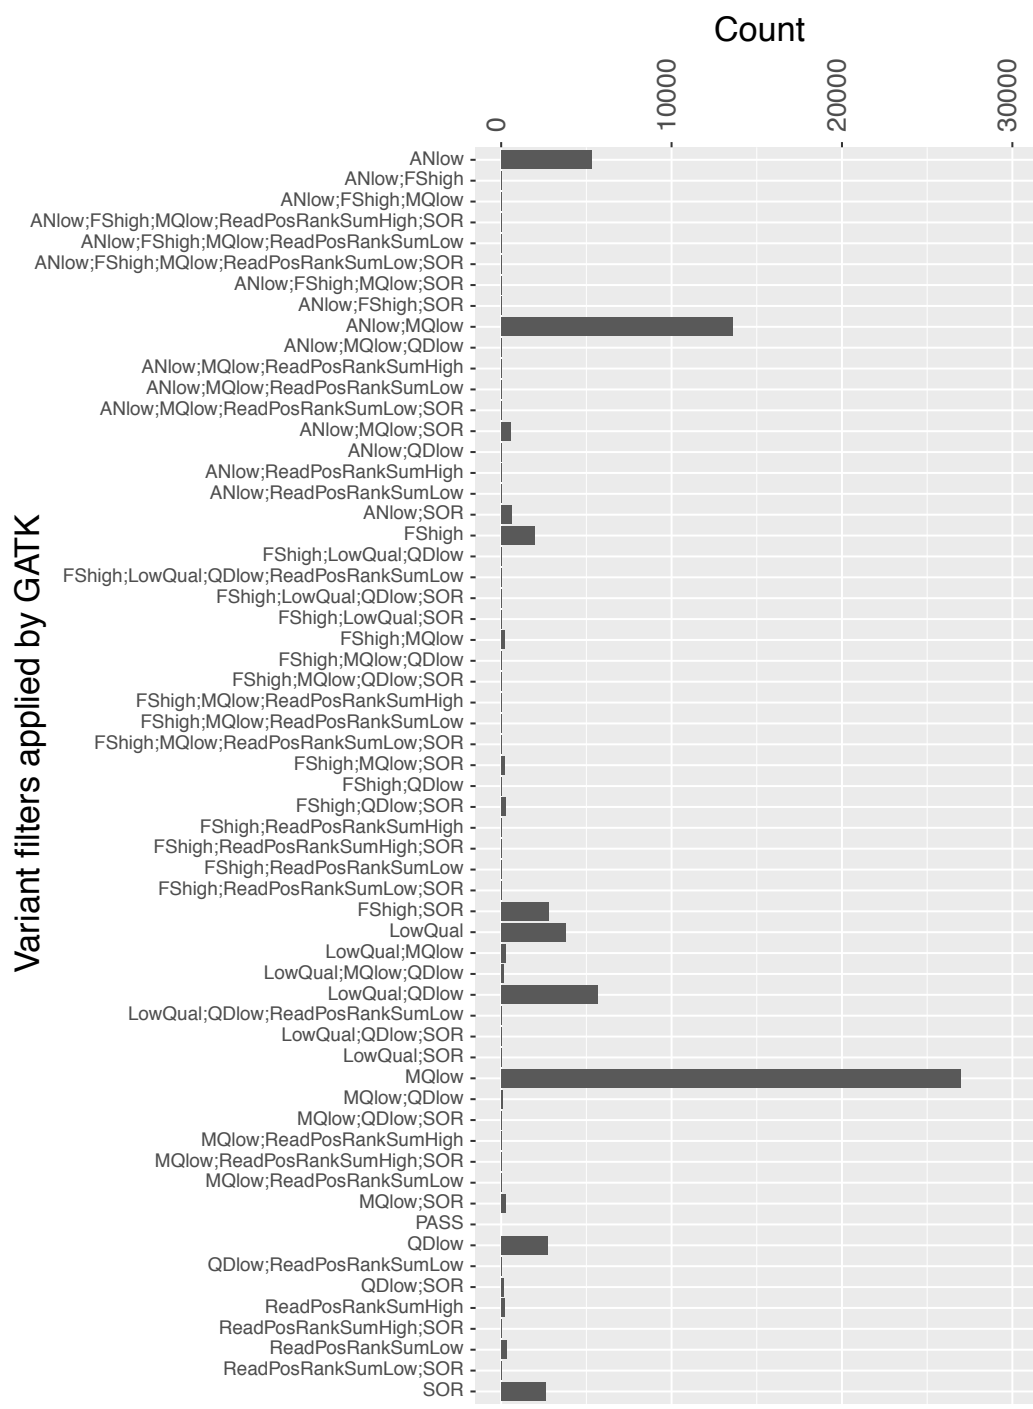

**Supplementary Figure 40: Outcome of indel variant filtration.** Candidate indel variants filtered out by different filter combinations. See methods for individual filter settings.

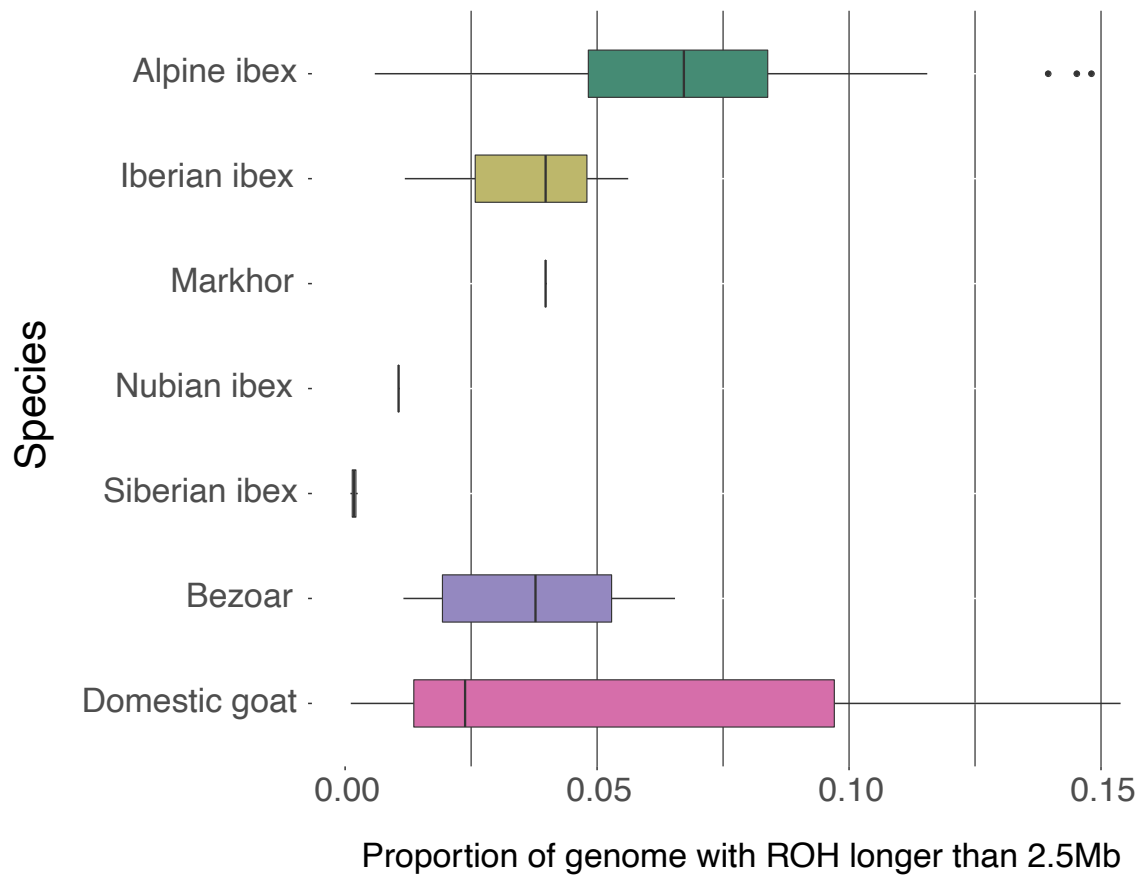

**Supplementary Figure 41: Runs of homozygosity (ROH) among species evaluated using PLINK.** Proportion of the genome with ROH longer than 2.5 Mb estimated using the software PLINK. Box plot elements as in Supplementary Figure 2A.

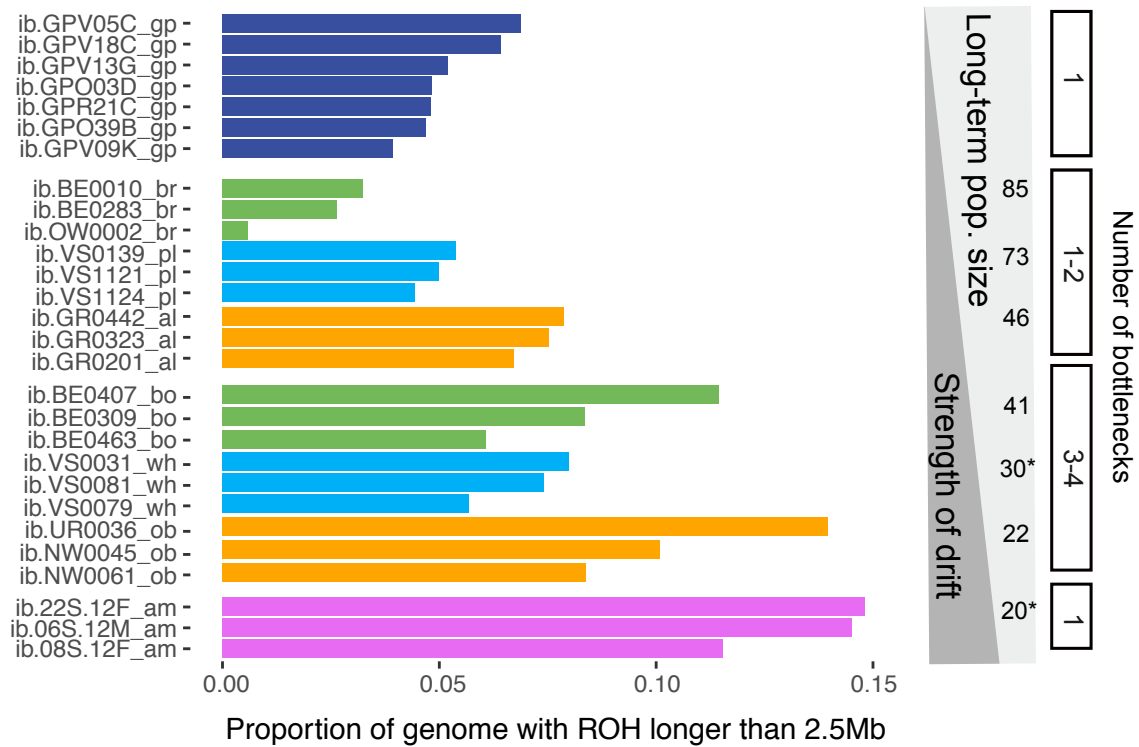

**Supplementary Figure 42: Runs of homozygosity (ROH) in Alpine ibex evaluated using PLINK.**  
 Proportion of the genome with ROH longer than 2.5 Mb estimated using the software PLINK.

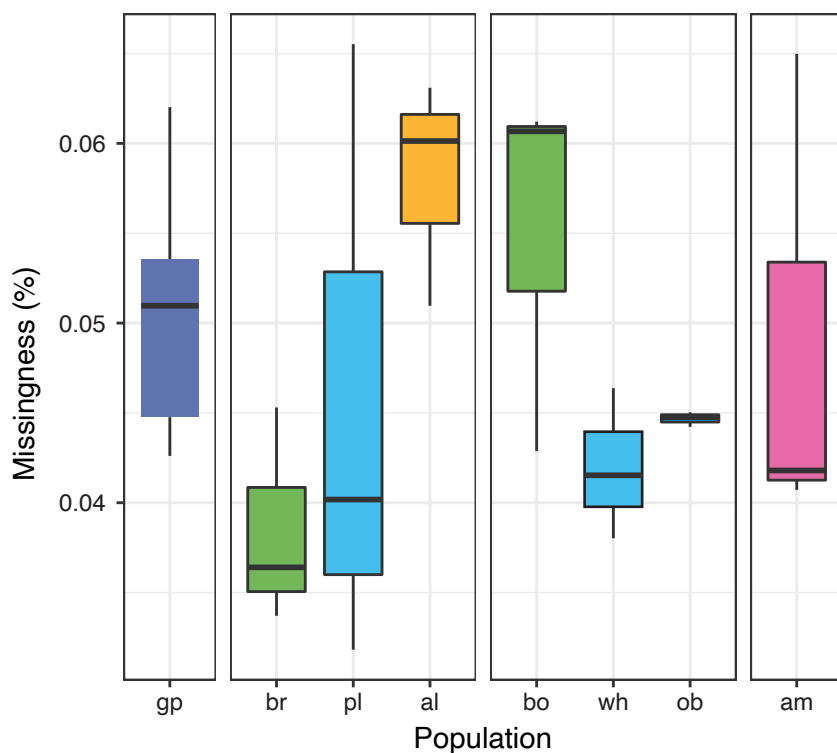

**Supplementary Figure 43: Missingness across loci and populations.** Boxplot showing the percentage of loci with missing data (missingness) reported by individual and grouped by population. Box plot elements as in Supplementary Figure 2A.

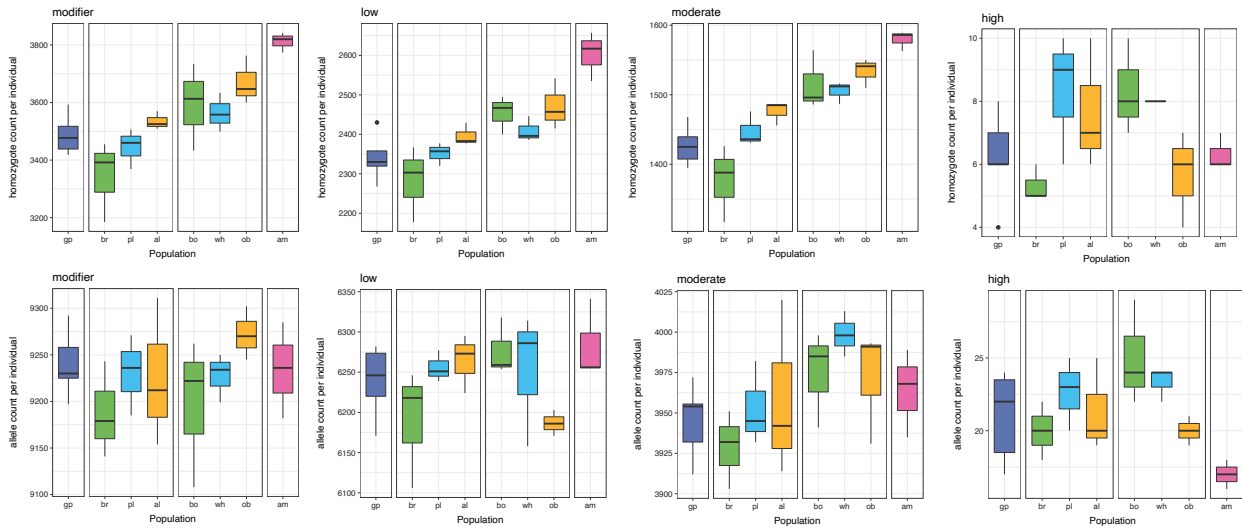

**Supplementary Figure 44: Individual genetic load (based on SnpEff).** Individual homozygote counts (upper panel) and allele counts (lower panel) for each Alpine ibex population with no missingness allowed. Left to right shows SNP mutation category as predicted by SnpEff (modifier, low, moderate and high). Colors group Alpine ibex populations into founder and descendent population pairs (see also Figures 3 and S13A). Box plot elements as in Supplementary Figure 2A.

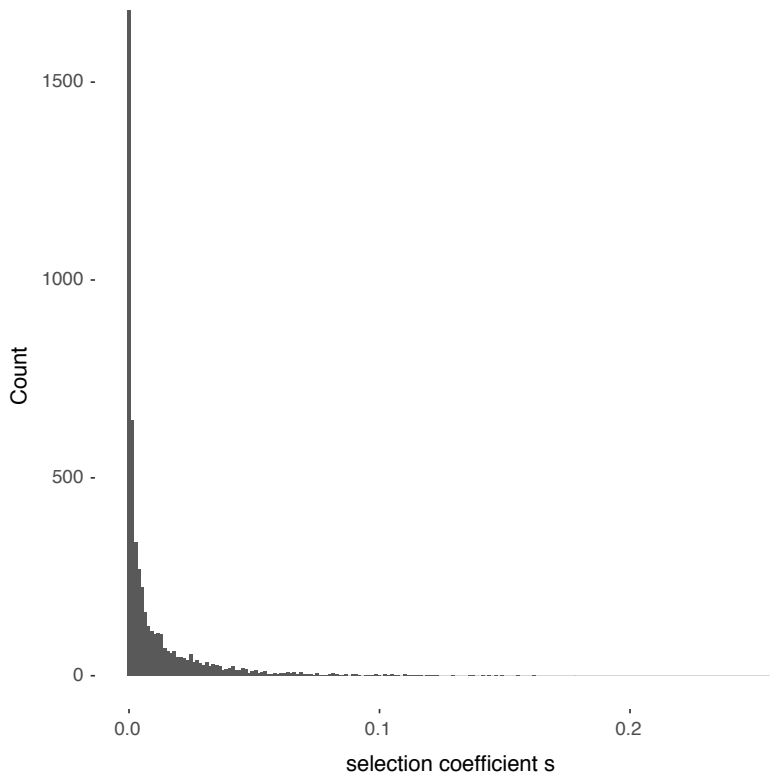

**Supplementary Figure 45: Distribution of the selection coefficient  $s$  used in the simulations.**

## SUPPLEMENTARY TABLES

**Supplementary Table 1A: Demographic information on Alpine ibex populations.** Gran Paradiso was the only surviving population and at the source of all introduced populations. Effective founder group size differs from total released numbers if knowledge was available about mortality after population establishment. Long-term population size was calculated as the harmonic mean of census size since population founding. \*) Estimated numbers based on historic record.

| <b>Alpine ibex</b><br>[extant census 50'000<br>individuals] | <b>Date of<br/>foundation</b> | <b>Males<br/>released</b> | <b>Females<br/>released</b> | <b>Total released</b> | <b>Effective<br/>founder<br/>group size</b> | <b>Long-term<br/>population size<br/>(from foundation<br/>up to 2007)</b> | <b>Census 2007</b> |
|-------------------------------------------------------------|-------------------------------|---------------------------|-----------------------------|-----------------------|---------------------------------------------|---------------------------------------------------------------------------|--------------------|
| <b>Population</b>                                           |                               |                           |                             |                       |                                             |                                                                           |                    |
| <b>Gran Paradiso</b> <sup>1,2</sup>                         |                               | -                         | -                           | -                     | 100*                                        | n/a                                                                       | n/a                |
| <b>Albris (al)</b> <sup>3</sup>                             | 1920-34                       | 16                        | 26                          | 42                    | 42                                          | 46                                                                        | 1033               |
| <b>Alpi Maritime (am)</b> <sup>4,5</sup>                    | 1920-30                       |                           |                             | 25                    | 6                                           | 20*                                                                       | 750                |
| <b>Bire Oeschinen (bo)</b> <sup>3</sup>                     | 1961-62                       | 4                         | 9                           | 13                    | 13                                          | 41                                                                        | 68                 |
| <b>Brienzer Rothorn (br)</b> <sup>3</sup>                   | 1921-25                       | 8                         | 10                          | 18                    | 18                                          | 85                                                                        | 288                |
| <b>Oberbauenstock (ob)</b> <sup>3</sup>                     | 1968-86                       | 10                        | 12                          | 22                    | 22                                          | 22                                                                        | 164                |
| <b>Pilatus (pi)</b> <sup>3</sup>                            | 1961-65                       | 8                         | 7                           | (unknown sex: 2) 17   | 17                                          | 43                                                                        | 104                |
| <b>Pleureur (pl)</b> <sup>3</sup>                           | 1928-35                       | 6                         | 9                           | 15                    | 15                                          | 73                                                                        | (year 2003) 806    |
| <b>Weisshorn (wh)</b> <sup>6</sup>                          | 1962-69                       | 18                        | 6                           | 24                    | 24                                          | 30*                                                                       | 354                |



**Supplementary Table 1B: Demographic information on three major Iberian ibex populations.** Included are both extant subspecies of *Capra pyrenaica*. Bottleneck periods represent the most dramatic, known reductions in population size. Sierra Nevada and Maestrazgo populations experienced only recent bottlenecks (1960s).

| Iberian ibex          | Subspecies                       | Strengths of known bottleneck periods<br>[estimated individuals]                                                                    | Population size changes over time<br>[if available]                                                                                                   | Current population size |
|-----------------------|----------------------------------|-------------------------------------------------------------------------------------------------------------------------------------|-------------------------------------------------------------------------------------------------------------------------------------------------------|-------------------------|
| Sierra Nevada (sn)    | <i>Capra pyrenaica hispanica</i> | ~600 (1960s) <sup>7</sup>                                                                                                           | n/a                                                                                                                                                   | 16'000 <sup>8</sup>     |
| Maestrazgo (hb)       | <i>Capra pyrenaica hispanica</i> | ~30 (1960s) <sup>7</sup>                                                                                                            | 450 (1966) <sup>8</sup><br>700 (1970) <sup>8-11</sup><br>>3000 (1977) <sup>8-11</sup><br>3800 (1979) <sup>8-11</sup><br>> 5000 (1981) <sup>8-11</sup> | 7000 <sup>7</sup>       |
| Sierra de Gredos (vi) | <i>Capra pyrenaica victoriae</i> | 50 (1895) <sup>7</sup><br>12 (1905) <sup>7</sup><br>350 (1912) <sup>7</sup><br>500 (1914) <sup>7</sup><br>>1000 (1917) <sup>7</sup> | 2150 (1961) <sup>7</sup><br>4000 (1976) <sup>8-10</sup><br>9000 (1978) <sup>8-10</sup><br>8000 (1993) <sup>8-10</sup>                                 | 8000 <sup>7</sup>       |

**Supplementary Table 2: Overview of individual sampling.** Overview of all sequenced individuals grouped by species including the IUCN conservation status and recent demographic events. Whole-genome sequencing data, reference genome mapping and single nucleotide polymorphism (SNP) statistics are shown.

| Sample                                                                                                              | Population       | Sex    | Location                          | Coordinates (Swiss grid or latitude/longitude) | Raw sequencing data (Gbp) | Mapping rate (%) | Coverage (X) | Number of SNPs genotyped | Number of heterozygote SNPs |           |
|---------------------------------------------------------------------------------------------------------------------|------------------|--------|-----------------------------------|------------------------------------------------|---------------------------|------------------|--------------|--------------------------|-----------------------------|-----------|
| <b>Alpine ibex: Recent bottlenecks, IUCN: Least concern</b><br>N=29, 3'539'135 SNPs, nucleotide diversity: 0.00039  |                  |        |                                   |                                                |                           |                  |              |                          |                             |           |
| ib.06S.12M_am                                                                                                       | Alpi Maritimi    | male   | Rovina                            |                                                |                           | 60.0             | 99.0         | 17.5                     | 56'126'898                  | 667'046   |
| ib.08S.12F_am                                                                                                       | Alpi Maritimi    | female | Matto                             |                                                |                           | 65.2             | 98.9         | 18.8                     | 56'126'955                  | 669'730   |
| ib.22S.12F_am                                                                                                       | Alpi Maritimi    | female | Barra                             |                                                |                           | 60.2             | 99.1         | 17.6                     | 56'126'911                  | 660'179   |
| ib.BE0010_br                                                                                                        | Brienzer Rothorn | female | Stelli, Hofstetten                | 181400 649600                                  |                           | 64.3             | 99.2         | 19.5                     | 56'127'089                  | 938'208   |
| ib.BE0283_br                                                                                                        | Brienzer Rothorn | female | Salenwang                         | 180600 650250                                  |                           | 69.5             | 99.1         | 21.1                     | 56'127'180                  | 954'605   |
| ib.BE0309_bo                                                                                                        | Bire Oeschinen   | female | Schwarzhorn Oeschinen             | 151400 624850                                  |                           | 59.6             | 98.7         | 18.1                     | 56'126'958                  | 803'869   |
| ib.BE0407_bo                                                                                                        | Bire Oeschinen   | male   | Oeschinensee, Heuberg             | 150750 621800                                  |                           | 55.5             | 99.1         | 17.2                     | 56'126'864                  | 753'333   |
| ib.BE0463_bo                                                                                                        | Bire Oeschinen   | male   | Oeschinensee, Underbürgli         | 150750 622600                                  |                           | 59.7             | 99.1         | 18.7                     | 56'126'974                  | 889'571   |
| ib.GPO03D_gp                                                                                                        | Gran Paradiso    | male   | Orco, Chiapli sup                 | 45.4684 7.1474                                 |                           | 58.8             | 98.9         | 17.3                     | 56'126'869                  | 906'666   |
| ib.GPO39B_gp                                                                                                        | Gran Paradiso    | male   | Orco                              | 45.4644 7.1588                                 |                           | 58.3             | 99.0         | 17.2                     | 56'126'868                  | 958'991   |
| ib.GPR21C_gp                                                                                                        | Gran Paradiso    | male   | Rhemes                            | 45.5637 7.1400                                 |                           | 57.2             | 99.2         | 17.7                     | 56'126'849                  | 925'983   |
| ib.GPV05C_gp                                                                                                        | Gran Paradiso    | female | Valsaveranche, Levionaz           | 45.5821 7.2262                                 |                           | 60.9             | 99.2         | 18.4                     | 56'126'978                  | 834'684   |
| ib.GPV09K_gp                                                                                                        | Gran Paradiso    | male   | Valsaveranche, Levionaz           | 45.5746 7.2398                                 |                           | 56.4             | 99.0         | 17.0                     | 56'126'827                  | 924'811   |
| ib.GPV13G_gp                                                                                                        | Gran Paradiso    | male   | Valsaveranche, Levionaz           | 45.5779 7.2333                                 |                           | 56.8             | 99.0         | 16.6                     | 56'126'804                  | 900'629   |
| ib.GPV18C_gp                                                                                                        | Gran Paradiso    | male   | Valsaveranche, Levionaz           | 45.5779 7.2333                                 |                           | 63.5             | 99.1         | 20.0                     | 56'127'046                  | 889'186   |
| ib.GR0140_rh                                                                                                        | Rheinwaldhorn    | female | Scalutta Gem Safien               | 166250 741820                                  |                           | 54.3             | 98.7         | 16.8                     | 56'126'827                  | 733'524   |
| ib.GR0201_al                                                                                                        | Albris           | female | Munt Blais, Gm S-chanf            | 166065 799210                                  |                           | 56.1             | 99.2         | 17.4                     | 56'126'937                  | 854'091   |
| ib.GR0323_al                                                                                                        | Albris           | female | Paradies Suot, Pontresina         | 150740 791325                                  |                           | 60.8             | 99.1         | 18.3                     | 56'126'987                  | 856'238   |
| ib.GR0442_al                                                                                                        | Albris           | male   | Val da Fain Tschüffer, Pontresina | 150160 797230                                  |                           | 60.2             | 99.0         | 18.6                     | 56'127'038                  | 818'724   |
| ib.NW0045_ob                                                                                                        | Oberbauerstock   | male   | Hoh Brisen                        | 194450 678200                                  |                           | 55.6             | 98.9         | 17.3                     | 56'126'878                  | 768'646   |
| ib.NW0061_ob                                                                                                        | Oberbauerstock   | female | Niederbauen                       | 200200 685050                                  |                           | 58.9             | 99.2         | 17.8                     | 56'126'939                  | 787'534   |
| ib.OW0002_br                                                                                                        | Brienzer Rothorn | male   | Eisee, Giswil                     | 182251 646972                                  |                           | 63.8             | 98.6         | 19.6                     | 56'127'113                  | 1'102'820 |
| ib.UR0036_ob                                                                                                        | Oberbauerstock   | female | IsenhalBärenstock                 | 193371 681175                                  |                           | 61.0             | 97.8         | 18.1                     | 56'126'939                  | 695'986   |
| ib.VS0031_Wh                                                                                                        | Weisshorn        | female | Jungen, St. Niklaus               | 115700 627300                                  |                           | 56.5             | 99.1         | 17.4                     | 56'126'843                  | 842'412   |
| ib.VS0079_Wh                                                                                                        | Weisshorn        | female | Seetal, Gde. Grächen              | 117000 627750                                  |                           | 62.3             | 99.1         | 20.2                     | 56'127'095                  | 876'610   |
| ib.VS0081_Wh                                                                                                        | Weisshorn        | female | Jungen, Gde. St. Niklaus          | 117000 627750                                  |                           | 60.0             | 99.0         | 19.5                     | 56'126'935                  | 805'493   |
| ib.VS0139_pl                                                                                                        | Pleureur         | male   | Dixence-Evolène                   | 101000 595000                                  |                           | 62.0             | 99.0         | 19.4                     | 56'127'046                  | 916'987   |
| ib.VS1121_pl                                                                                                        | Pleureur         | female | Verbier                           | 105100 586700                                  |                           | 60.9             | 98.9         | 18.4                     | 56'126'971                  | 864'945   |
| ib.VS1124_pl                                                                                                        | Pleureur         | male   | Boussine                          | 87250 592900                                   |                           | 54.4             | 98.8         | 17.0                     | 56'126'830                  | 947'985   |
| <b>Iberian ibex: Recent bottlenecks, IUCN: Least concern</b><br>N=4, 4'353'580 SNPs, nucleotide diversity: 0.00066  |                  |        |                                   |                                                |                           |                  |              |                          |                             |           |
| py.V53_vi                                                                                                           |                  |        | Sierra de Gredos                  |                                                |                           | 60.0             | 91.3         | 15.3                     | 56'126'235                  | 1'274'362 |
| py.V66_vi                                                                                                           |                  |        | Sierra de Gredos                  |                                                |                           | 60.3             | 94.2         | 15.3                     | 56'126'292                  | 1'000'193 |
| py.M518_sn                                                                                                          | Sierra Nevada    |        | Sierra Nevada                     |                                                |                           | 88.0             | 99.1         | 26.9                     | 56'127'272                  | 1'000'228 |
| py.Z5_hb                                                                                                            |                  |        | Maestrazgo                        |                                                |                           | 56.4             | 99.2         | 17.0                     | 56'126'788                  | 960'783   |
| <b>Nubian ibex: Fragmented populations, IUCN: Vulnerable</b><br>N=2, 6'980'112 SNPs, nucleotide diversity: 0.00151  |                  |        |                                   |                                                |                           |                  |              |                          |                             |           |
| nu.ibx20                                                                                                            |                  |        | Sinai, Egypt                      |                                                |                           | 102.5            | 98.6         | 17.1                     | 56'126'494                  | 3'131'909 |
| nu.ibx61                                                                                                            |                  |        | Howtat, Central Saudi Arabia      |                                                |                           | 46.9             | 98.7         | 18.4                     | 56'126'885                  | 2'536'433 |
| <b>Markhor: Fragmented populations, IUCN: Near Threatened</b><br>N=1, 1'988'577 SNPs, nucleotide diversity: 0.00077 |                  |        |                                   |                                                |                           |                  |              |                          |                             |           |
| faI.Cafall                                                                                                          |                  |        | Dasht-i Jum Reserve, Tajikistan   |                                                |                           | 148.7            | 98.9         | 38.6                     | 56'127'403                  | 1'845'346 |
| <b>Siberian ibex: Large populations, IUCN: Least concern</b><br>N=2, 10'433'689 SNPs, nucleotide diversity: 0.00224 |                  |        |                                   |                                                |                           |                  |              |                          |                             |           |
| si.Casi1                                                                                                            |                  | male   | South of Issyk lake               |                                                |                           | 57.4             | 98.7         | 15.8                     | 56'126'287                  | 4'379'849 |
| si.Casi2                                                                                                            |                  | male   | Dasht-i Jum Reserve, Tajikistan   |                                                |                           | 80.1             | 98.8         | 22.0                     | 56'126'976                  | 4'823'262 |
| <b>Bezoar: Large populations, IUCN: Vulnerable</b><br>N=6, 15'182'016 SNPs, nucleotide diversity: 0.00191           |                  |        |                                   |                                                |                           |                  |              |                          |                             |           |
| IRCA-C3-1001                                                                                                        |                  | male   | Marakan                           | 45.16 38.63                                    | 37.6                      | 99.1             | 11.5         | 56'127'088               | 3'212'565                   |           |
| IRCA-G2-5063                                                                                                        |                  | male   | Arasbaran                         | 47.13 39.18                                    | 36.5                      | 98.7             | 11.6         | 56'127'115               | 3'610'951                   |           |
| IRCA-I11-0001                                                                                                       |                  | male   | Khan Gormaz                       | 48.20 34.60                                    | 19.1                      | 99.0             | 5.9          | 56'126'263               | 2'293'061                   |           |
| IRCA-I6-5237                                                                                                        |                  | male   | Karnagh                           | 48.39 37.16                                    | 34.6                      | 99.1             | 11.3         | 56'127'111               | 3'402'754                   |           |
| IRCA-K12-0005                                                                                                       |                  | male   | Lashgar Dar                       | 49.05 34.21                                    | 19.7                      | 99.0             | 6.3          | 56'126'443               | 2'524'631                   |           |
| IRCA-M12-0008                                                                                                       |                  | male   | khomein                           | 50.34 34.18                                    | 32.4                      | 99.0             | 10.1         | 56'127'049               | 3'972'538                   |           |
| <b>Domestic goat</b><br>N=16, 21'943'431 SNPs, nucleotide diversity: 0.00198                                        |                  |        |                                   |                                                |                           |                  |              |                          |                             |           |
| FRCH-AL-0002                                                                                                        | Alpine           | female | .                                 | -0.36 46.69                                    | 41.5                      | 99.2             | 12.8         | 56'127'200               | 3'826'421                   |           |
| FRCH-SA-0001                                                                                                        | Saanen           | female | .                                 | -0.28 46.57                                    | 40.4                      | 99.2             | 12.1         | 56'127'136               | 3'919'140                   |           |
| IRCH-B3-5031                                                                                                        | .                | female | Khoiy                             | 44.94 38.65                                    | 38.0                      | 99.2             | 12.0         | 56'127'181               | 4'539'659                   |           |
| IRCH-C5-5206                                                                                                        | .                | male   | Nushin Shahr                      | 45.06 37.78                                    | 39.0                      | 99.1             | 12.1         | 56'127'214               | 3'170'212                   |           |
| IRCH-F3-5044                                                                                                        | .                | female | Ahar                              | 46.85 38.52                                    | 39.4                      | 99.2             | 11.6         | 56'127'110               | 4'051'773                   |           |
| IRCH-F4-5093                                                                                                        | .                | female | Vazarghan                         | 46.61 38.30                                    | 39.6                      | 99.2             | 11.9         | 56'127'128               | 3'322'150                   |           |
| IRCH-G5-5185                                                                                                        | .                | male   | Sarab                             | 47.08 37.97                                    | 35.5                      | 99.1             | 11.5         | 56'127'172               | 4'358'311                   |           |
| ITCH-SA-0001                                                                                                        | Saanen           | .      | .                                 | .                                              | .                         | 46.7             | 98.9         | 13.8                     | 56'127'216                  | 3'999'955 |
| ITCH-SA-0005                                                                                                        | Saanen           | .      | .                                 | .                                              | .                         | 44.5             | 98.4         | 13.0                     | 56'127'156                  | 3'983'967 |
| MOCH-AA10-2195                                                                                                      | landrace         | male   | Maaterka                          | -1.82 32.52                                    | 35.8                      | 99.0             | 11.2         | 56'127'031               | 3'895'474                   |           |
| MOCH-L10-3100                                                                                                       | landrace         | male   | Ayir                              | -9.06 32.70                                    | 38.3                      | 99.1             | 12.0         | 56'127'148               | 2'717'970                   |           |
| MOCH-Q15-1143                                                                                                       | landrace         | female | Foum Zguid                        | -6.58 30.08                                    | 37.3                      | 99.2             | 11.7         | 56'127'163               | 2'416'000                   |           |
| MOCH-R5-0037                                                                                                        | landrace         | female | Khmiss Sahel                      | -6.09 35.20                                    | 35.1                      | 99.1             | 10.9         | 56'127'117               | 3'544'065                   |           |
| MOCH-S8-2252                                                                                                        | landrace         | male   | Al Hajeb                          | -5.67 33.81                                    | 41.1                      | 99.1             | 13.0         | 56'127'171               | 2'596'402                   |           |
| MOCH-V5-3059                                                                                                        | landrace         | female | Beni Boufrah                      | -4.30 35.10                                    | 40.8                      | 99.2             | 12.6         | 56'127'190               | 4'151'251                   |           |
| hI.PCGA06                                                                                                           | Peacock          | .      | .                                 | .                                              | .                         | 62.3             | 99.2         | 19.5                     | 56'127'329                  | 4'098'566 |

**Supplementary Table 3: Summary of runs of homozygosity (ROH).** Total length per ROH category. Note that categories are overlapping. Populations abbreviated by am: Alpi Marittime, gp: Gran Paradiso; al: Albris; bo: Bire Öschinen; br: Brienzer Rothorn; ob: Oberbauenstock; pl: Pleureur; rh: Rheinwald; wh: Weisshorn. NA: no population/breed assigned. A) Analysis settings af.dflt 0.4, M=0.0000012, run with Viterbi. B) Settings af.dflt 0.4, M=0.0000012.

| Individual                                       | 100-500 Kb  | >100 kb       | >500 kb       | >2.5 Mb     | 2.5-10 Mb   | >10 Mb      | Population/<br>Breed | Species             |
|--------------------------------------------------|-------------|---------------|---------------|-------------|-------------|-------------|----------------------|---------------------|
| Settings: af.dflt 0.4, M=0.0000012, with Viterbi |             |               |               |             |             |             |                      |                     |
| ib.GR0201_al                                     | 617316226   | 1'499'036'113 | 881'719'887   | 278'054'595 | 278'054'595 | 0           | al                   | <i>C. ibex</i>      |
| ib.GR0323_al                                     | 648'739'982 | 1'568'056'539 | 919'316'557   | 271'420'074 | 271'420'074 | 0           | al                   | <i>C. ibex</i>      |
| ib.GR0442_al                                     | 638'635'462 | 1'619'373'279 | 980'737'817   | 293'579'234 | 293'579'234 | 0           | al                   | <i>C. ibex</i>      |
| ib.08S.12F_am                                    | 550'622'660 | 1'883'994'916 | 1'333'372'256 | 580'980'545 | 569'620'719 | 11'359'826  | am                   | <i>C. ibex</i>      |
| ib.06S.12M_am                                    | 526'257'448 | 1'814'566'314 | 1'288'308'866 | 531'521'579 | 531'521'579 | 0           | am                   | <i>C. ibex</i>      |
| ib.22S.12F_am                                    | 485'235'630 | 1'826'304'781 | 1'341'069'151 | 604'013'148 | 604'013'148 | 0           | am                   | <i>C. ibex</i>      |
| ib.BE0309_bo                                     | 624'378'681 | 1'625'733'750 | 1'001'355'069 | 325'649'131 | 314'522'057 | 11'127'074  | bo                   | <i>C. ibex</i>      |
| ib.BE0407_bo                                     | 529'902'205 | 1'628'035'706 | 1'098'133'501 | 444'950'345 | 444'950'345 | 0           | bo                   | <i>C. ibex</i>      |
| ib.BE0463_bo                                     | 714'827'140 | 1'586'641'537 | 871'814'397   | 233'878'805 | 233'878'805 | 0           | bo                   | <i>C. ibex</i>      |
| ib.BE0010_br                                     | 743'914'314 | 1'653'878'572 | 909'964'258   | 238'950'631 | 238'950'631 | 0           | br                   | <i>C. ibex</i>      |
| ib.BE0283_br                                     | 808'881'190 | 1'775'794'639 | 966'913'449   | 264'644'590 | 254'642'196 | 10'002'394  | br                   | <i>C. ibex</i>      |
| ib.OW0002_bo                                     | 761'260'031 | 1'667'152'587 | 905'892'556   | 199'762'116 | 199'762'116 | 0           | br                   | <i>C. ibex</i>      |
| ib.GPR21C_gp                                     | 678'473'743 | 1'434'407'783 | 755'934'040   | 175'346'650 | 175'346'650 | 0           | gp                   | <i>C. ibex</i>      |
| ib.GPV05C_gp                                     | 650'121'652 | 1'594'127'217 | 944'005'565   | 266'705'862 | 266'705'862 | 0           | gp                   | <i>C. ibex</i>      |
| ib.GPV18C_gp                                     | 777'624'987 | 1'682'216'743 | 904'591'756   | 236'158'730 | 236'158'730 | 0           | gp                   | <i>C. ibex</i>      |
| ib.GPO3D_gp                                      | 664'865'678 | 1'520'317'013 | 855'451'335   | 227'583'908 | 227'583'908 | 0           | gp                   | <i>C. ibex</i>      |
| ib.GPO39B_gp                                     | 709'970'926 | 1'471'650'951 | 761'680'025   | 151'298'231 | 151'298'231 | 0           | gp                   | <i>C. ibex</i>      |
| ib.GPV09K_gp                                     | 662'015'971 | 1'492'528'666 | 830'512'695   | 167'263'444 | 167'263'444 | 0           | gp                   | <i>C. ibex</i>      |
| ib.GPV13G_gp                                     | 647'435'577 | 1'493'675'120 | 846'239'543   | 194'612'790 | 194'612'790 | 0           | gp                   | <i>C. ibex</i>      |
| ib.NW0045_ob                                     | 573'664'491 | 1'615'991'379 | 1'042'326'888 | 370'839'466 | 360'195'918 | 10'643'548  | ob                   | <i>C. ibex</i>      |
| ib.NW0061_ob                                     | 595'069'740 | 1'616'525'100 | 1'021'455'360 | 336'713'979 | 325'950'950 | 10'763'029  | ob                   | <i>C. ibex</i>      |
| ib.UR0036_ob                                     | 561'427'932 | 1'762'789'124 | 1'201'361'192 | 514'766'948 | 504'014'248 | 10'752'700  | ob                   | <i>C. ibex</i>      |
| ib.VS0139_pl                                     | 746'261'010 | 1'630'720'974 | 884'459'964   | 225'660'318 | 225'660'318 | 0           | pl                   | <i>C. ibex</i>      |
| ib.VS1121_pl                                     | 634'868'136 | 1'645'766'132 | 1'010'897'996 | 326'843'120 | 326'843'120 | 0           | pl                   | <i>C. ibex</i>      |
| ib.VS1124_pl                                     | 636'991'188 | 1'368'015'802 | 731'024'614   | 139'861'308 | 139'861'308 | 0           | pl                   | <i>C. ibex</i>      |
| ib.GR0140_rh                                     | 543'598'033 | 1'597'032'136 | 1'053'434'103 | 324'940'186 | 324'940'186 | 0           | rh                   | <i>C. ibex</i>      |
| ib.VS0079_wh                                     | 738'754'492 | 1'697'873'813 | 959'119'321   | 273'245'245 | 249'102'537 | 24'142'708  | wh                   | <i>C. ibex</i>      |
| ib.VS0081_wh                                     | 656'387'409 | 1'725'855'351 | 1'069'467'942 | 333'444'887 | 333'444'887 | 0           | wh                   | <i>C. ibex</i>      |
| ib.VS0031_wh                                     | 635'312'736 | 1'548'163'493 | 912'850'757   | 301'607'030 | 291'518'068 | 10'088'962  | wh                   | <i>C. ibex</i>      |
| nu.ibx20                                         | 355'804'025 | 398'512'218   | 42'708'193    | 0           | 0           | 0           | NA                   | <i>C. nubiana</i>   |
| nu.ibx61                                         | 386'976'121 | 803'470'296   | 416'494'175   | 130'605'348 | 130'605'348 | 0           | NA                   | <i>C. nubiana</i>   |
| py.Z5_hb                                         | 391'166'242 | 1'262'581'533 | 871'415'291   | 281'367'004 | 256'892'451 | 24'474'553  | hb                   | <i>C. pyrenaica</i> |
| py.M518_sn                                       | 950'904'052 | 2'037'382'478 | 1'086'478'426 | 303'317'928 | 303'317'928 | 0           | sn                   | <i>C. pyrenaica</i> |
| py.V53_vi                                        | 579'842'010 | 1'102'731'313 | 522'889'303   | 478'178'848 | 478'178'848 | 0           | vi                   | <i>C. pyrenaica</i> |
| py.V66_vi                                        | 508'832'531 | 1'164'493'864 | 655'661'333   | 117'445'961 | 117'445'961 | 0           | vi                   | <i>C. pyrenaica</i> |
| si.Casil1                                        | 129'673'268 | 265'145'849   | 135'472'581   | 42'751'180  | 42'751'180  | 0           | NA                   | <i>C. sibirica</i>  |
| si.Casil2                                        | 387'043'290 | 544'294'224   | 157'250'934   | 15'395'187  | 15'395'187  | 0           | NA                   | <i>C. sibirica</i>  |
| IRCA-C3-1001                                     | 116'433'824 | 606'632'709   | 490'198'885   | 268'128'032 | 256'267'102 | 11'860'930  | NA                   | <i>C. aegagrus</i>  |
| IRCA-G2-5063                                     | 146'599'124 | 364'865'275   | 218'266'151   | 65'684'795  | 65'684'795  | 0           | NA                   | <i>C. aegagrus</i>  |
| IRCA-I11-0001                                    | 82'755'412  | 828'874'800   | 746'119'388   | 374'898'069 | 363'284'902 | 11'613'167  | NA                   | <i>C. aegagrus</i>  |
| IRCA-I6-5237                                     | 103'888'535 | 592'035'177   | 488'146'642   | 199'925'786 | 199'925'786 | 0           | NA                   | <i>C. aegagrus</i>  |
| IRCA-K12-0005                                    | 89'520'127  | 765'249'396   | 675'729'269   | 325'751'977 | 325'751'977 | 0           | NA                   | <i>C. aegagrus</i>  |
| IRCA-M12-0008                                    | 99'873'735  | 310'410'173   | 210'536'438   | 36'558'518  | 36'558'518  | 0           | NA                   | <i>C. aegagrus</i>  |
| fal.Cafall1                                      | 573'621'042 | 2'314'024'081 | 1'740'403'039 | 549'883'291 | 448'500'903 | 101'382'388 | NA                   | <i>C. falconeri</i> |
| FRCH-AL-0002                                     | 111'890'971 | 322'924'190   | 211'033'219   | 92'718'720  | 92'718'720  | 0           | Alpine               | <i>C. hircus</i>    |
| IRCH-B3-5031                                     | 53'738'058  | 60'736'586    | 6'998'528     | 0           | 0           | 0           | NA                   | <i>C. hircus</i>    |
| IRCH-C5-5206                                     | 71'091'645  | 786'587'520   | 715'495'875   | 450'008'904 | 427'535'728 | 22'473'176  | NA                   | <i>C. hircus</i>    |
| IRCH-F3-5044                                     | 59'526'367  | 299'946'902   | 240'420'535   | 120'980'706 | 120'980'706 | 0           | NA                   | <i>C. hircus</i>    |
| IRCH-F4-5093                                     | 57'578'725  | 696'091'487   | 638'512'762   | 371'049'415 | 358'859'987 | 12'189'428  | NA                   | <i>C. hircus</i>    |
| IRCH-G5-5185                                     | 72'654'707  | 87'703'744    | 15'049'037    | 0           | 0           | 0           | NA                   | <i>C. hircus</i>    |
| MOCH-AA10-2195                                   | 90'182'118  | 271'781'073   | 181'598'955   | 107'678'451 | 92'861'325  | 14'817'126  | landrace             | <i>C. hircus</i>    |
| MOCH-L10-3100                                    | 106'103'980 | 981'754'026   | 875'650'046   | 447'547'432 | 426'912'917 | 20'634'515  | landrace             | <i>C. hircus</i>    |
| MOCH-Q15-1143                                    | 94'753'992  | 1'103'076'736 | 1'008'322'744 | 639'531'078 | 587'996'693 | 51'534'385  | landrace             | <i>C. hircus</i>    |
| MOCH-R5-0037                                     | 76'703'976  | 484'745'657   | 408'041'681   | 245'431'572 | 233'806'996 | 11'624'576  | landrace             | <i>C. hircus</i>    |
| MOCH-S8-2252                                     | 96'022'567  | 1'028'257'715 | 932'235'148   | 552'459'778 | 510'277'731 | 42'182'047  | landrace             | <i>C. hircus</i>    |
| MOCH-V5-3059                                     | 104'574'015 | 171'184'148   | 666'10'133    | 13'521'240  | 13'521'240  | 0           | landrace             | <i>C. hircus</i>    |
| hi.PCGA06                                        | 281'436'611 | 410'435'725   | 128'999'114   | 73'150'162  | 73'150'162  | 0           | Peacock              | <i>C. hircus</i>    |
| FRCH-SA-0001                                     | 100'896'581 | 244'944'909   | 144'048'328   | 71'406'178  | 61'185'213  | 10'220'965  | Saanen               | <i>C. hircus</i>    |
| ITCH-SA-0001                                     | 112'477'470 | 244'286'695   | 131'809'225   | 54'227'488  | 54'227'488  | 0           | Saanen               | <i>C. hircus</i>    |
| ITCH-SA-0005                                     | 104'291'210 | 215'165'572   | 110'874'362   | 39'345'718  | 39'345'718  | 0           | Saanen               | <i>C. hircus</i>    |

| Individual                                                | 100-500 Kb    | >100 kb       | >500 kb       | >2.5 Mb       | 2.5-10 Mb     | >10 Mb      | Population/<br>Breed | Species                   |
|-----------------------------------------------------------|---------------|---------------|---------------|---------------|---------------|-------------|----------------------|---------------------------|
| <b>Settings: af.dift 0.4, M=0.000012, without Viterbi</b> |               |               |               |               |               |             |                      |                           |
| ib.GR0201_al                                              | 783'649'374   | 1'995'664'565 | 1'212'015'191 | 450'312'926   | 429'182'212   | 21'130'714  | al                   | <i>C. ibex</i>            |
| ib.GR0323_al                                              | 771'984'838   | 2'074'769'627 | 1'302'784'789 | 493'636'590   | 482'683'987   | 10'952'603  | al                   | <i>C. ibex</i>            |
| ib.GR0442_al                                              | 744'636'342   | 2'110'321'145 | 1'365'684'803 | 531'212'709   | 507'408'809   | 23'803'900  | al                   | <i>C. ibex</i>            |
| ib.08S.12F_am                                             | 506'440'668   | 2'215'138'383 | 1'708'697'715 | 886'398'299   | 757'676'854   | 128'721'445 | am                   | <i>C. ibex</i>            |
| ib.06S.12M_am                                             | 535'367'583   | 2'182'318'972 | 1'646'951'389 | 843'786'402   | 769'462'039   | 74'324'363  | am                   | <i>C. ibex</i>            |
| ib.22S.12F_am                                             | 504'894'041   | 2'177'064'831 | 1'672'170'790 | 924'503'363   | 788'231'278   | 136'272'085 | am                   | <i>C. ibex</i>            |
| ib.BE0309_bo                                              | 731'956'217   | 2'104'565'569 | 1'372'609'352 | 567'146'789   | 519'862'556   | 47'284'233  | bo                   | <i>C. ibex</i>            |
| ib.BE0407_bo                                              | 682'427'109   | 2'062'002'272 | 1'379'575'163 | 673'696'514   | 593'848'718   | 79'847'796  | bo                   | <i>C. ibex</i>            |
| ib.BE0463_bo                                              | 766'167'748   | 2'112'275'126 | 1'346'107'378 | 443'543'188   | 421'161'453   | 22'381'735  | bo                   | <i>C. ibex</i>            |
| ib.BE0010_br                                              | 746'218'372   | 2'155'341'482 | 1'409'123'110 | 431'098'700   | 420'768'536   | 10'330'164  | br                   | <i>C. ibex</i>            |
| ib.BE0283_br                                              | 648'107'833   | 2'231'657'101 | 1'583'549'268 | 543'880'783   | 505'040'297   | 38'840'486  | br                   | <i>C. ibex</i>            |
| ib.OW0002_br                                              | 725'021'312   | 2'177'987'516 | 1'452'966'204 | 477'831'355   | 454'859'576   | 22'971'779  | br                   | <i>C. ibex</i>            |
| ib.GPR21C_gp                                              | 876'341'653   | 2'008'306'378 | 1'131'964'725 | 363'481'599   | 352'877'217   | 10'604'382  | gp                   | <i>C. ibex</i>            |
| ib.GPV05C_gp                                              | 772'343'629   | 2'102'615'900 | 1'330'272'271 | 453'794'181   | 441'906'799   | 11'887'382  | gp                   | <i>C. ibex</i>            |
| ib.GPV18C_gp                                              | 729'634'379   | 2'175'335'815 | 1'445'701'436 | 434'715'929   | 424'683'247   | 10'032'682  | gp                   | <i>C. ibex</i>            |
| ib.GPO03D_gp                                              | 784'511'145   | 2'060'500'449 | 1'275'989'304 | 379'316'440   | 340'167'171   | 39'149'269  | gp                   | <i>C. ibex</i>            |
| ib.GPO39B_gp                                              | 828'638'496   | 2'037'365'688 | 1'208'727'192 | 316'277'004   | 316'277'004   | 0           | gp                   | <i>C. ibex</i>            |
| ib.GPV09K_gp                                              | 814'803'919   | 2'028'835'721 | 1'214'031'802 | 354'293'490   | 354'293'490   | 0           | gp                   | <i>C. ibex</i>            |
| ib.GPV13G_gp                                              | 791'183'333   | 2'006'827'487 | 1'215'644'154 | 342'628'909   | 342'628'909   | 0           | gp                   | <i>C. ibex</i>            |
| ib.NW0045_ob                                              | 683'383'101   | 2'055'828'846 | 1'372'445'745 | 595'495'883   | 564'218'995   | 31'276'888  | ob                   | <i>C. ibex</i>            |
| ib.NW0061_ob                                              | 722'075'711   | 2'094'887'534 | 1'372'811'823 | 622'284'739   | 573'736'535   | 48'548'204  | ob                   | <i>C. ibex</i>            |
| ib.UR0036_ob                                              | 617'068'750   | 2'158'114'200 | 1'541'045'450 | 767'497'546   | 697'638'277   | 69'859'269  | ob                   | <i>C. ibex</i>            |
| ib.VS0139_pl                                              | 758'740'285   | 2'145'084'721 | 1'386'344'436 | 449'421'486   | 415'295'277   | 34'126'209  | pl                   | <i>C. ibex</i>            |
| ib.VS1121_pl                                              | 731'045'337   | 2'127'252'036 | 1'396'206'699 | 534'826'955   | 469'751'317   | 65'075'638  | pl                   | <i>C. ibex</i>            |
| ib.VS1124_pl                                              | 873'505'705   | 1'924'745'798 | 1'051'240'093 | 275'850'892   | 275'850'892   | 0           | pl                   | <i>C. ibex</i>            |
| ib.GR0140_rh                                              | 669'983'274   | 2'001'957'025 | 1'331'973'751 | 575'091'026   | 550'389'677   | 24'701'349  | rh                   | <i>C. ibex</i>            |
| ib.VS0079_wh                                              | 734'275'706   | 2'152'755'412 | 1'418'479'706 | 502'302'612   | 454'745'847   | 47'556'765  | wh                   | <i>C. ibex</i>            |
| ib.VS0081_wh                                              | 685'673'558   | 2'142'824'732 | 1'457'151'174 | 579'985'076   | 541'409'137   | 38'575'939  | wh                   | <i>C. ibex</i>            |
| ib.VS0031_wh                                              | 759'969'197   | 2'029'774'334 | 1'269'805'137 | 476'045'828   | 428'999'287   | 47'046'541  | wh                   | <i>C. ibex</i>            |
| nu.ibx20                                                  | 645'141'286   | 764'369'563   | 119'228'277   | 4'946'168     | 4'946'168     | 0           | NA                   | <i>C. nubiana</i>         |
| nu.ibx61                                                  | 812'058'278   | 1'328'614'042 | 516'555'764   | 260'303'299   | 260'303'299   | 0           | NA                   | <i>C. nubiana</i>         |
| py.Z5_hb                                                  | 815'478'576   | 1'896'275'992 | 1'080'797'416 | 493'413'944   | 408'045'097   | 85'368'847  | hb                   | <i>C. pyrenaica</i>       |
| py.M518_sn                                                | 332'469'317   | 2'347'523'839 | 2'015'054'522 | 845'012'933   | 831'829'914   | 13'183'019  | sn                   | <i>C. pyrenaica</i>       |
| py.V53_vi                                                 | 819'670'708   | 1'640'855'629 | 821'184'921   | 186'497'356   | 186'497'356   | 0           | vi                   | <i>C. pyrenaica</i>       |
| py.V66_vi                                                 | 736'060'943   | 1'618'831'409 | 882'770'466   | 256'608'832   | 227'041'412   | 29'567'420  | vi                   | <i>C. pyrenaica</i>       |
| si.Casi1                                                  | 255'207'615   | 408'162'919   | 152'955'304   | 75'253'542    | 51'229'618    | 24'023'924  | NA                   | <i>C. sibirica</i>        |
| si.Casi2                                                  | 1'006'207'772 | 1'244'095'194 | 237'887'422   | 38'624'317    | 38'624'317    | 0           | NA                   | <i>C. sibirica</i>        |
| IRCA-C3-1001                                              | 149'214'281   | 673'260'511   | 524'046'230   | 367'252'324   | 276'738'287   | 90'514'037  | NA                   | <i>C. aegagrus</i>        |
| IRCA-G2-5063                                              | 195'537'312   | 445'690'958   | 250'153'646   | 95'027'576    | 84'593'640    | 10'433'936  | NA                   | <i>C. aegagrus</i>        |
| IRCA-111-0001                                             | 68'939'368    | 846'990'938   | 778'051'570   | 541'984'632   | 454'595'429   | 87'389'203  | NA                   | <i>C. aegagrus</i>        |
| IRCA-I6-5237                                              | 120'388'494   | 641'820'877   | 521'432'383   | 336'343'434   | 324'887'694   | 11'455'740  | NA                   | <i>C. aegagrus</i>        |
| IRCA-K12-0005                                             | 74'421'878    | 779'866'962   | 705'445'084   | 465'174'475   | 384'455'993   | 80'718'482  | NA                   | <i>C. aegagrus</i>        |
| IRCA-M12-0008                                             | 93'266'760    | 338'597'836   | 245'331'076   | 97'126'960    | 97'126'960    | 0           | NA                   | <i>C. aegagrus</i>        |
| fal.Cafal1                                                | 86'633'715    | 2'391'817'852 | 2'305'184'137 | 1'702'176'670 | 1'340'824'547 | 361'352'123 | NA                   | <i>C. falconeri</i>       |
| FRCH-AL-0002                                              | 193'289'812   | 416'876'710   | 223'586'898   | 150'003'969   | 150'003'969   | 0           | Alpine               | <i>C. aegagrus hircus</i> |
| IRCH-B3-5031                                              | 102'635'552   | 113'614'146   | 10'978'594    | 0             | 0             | 0           | NA                   | <i>C. aegagrus hircus</i> |
| IRCH-C5-5206                                              | 80'643'047    | 824'805'115   | 744'162'068   | 614'532'865   | 537'104'184   | 77'428'681  | NA                   | <i>C. aegagrus hircus</i> |
| IRCH-F3-5044                                              | 89'815'929    | 342'912'438   | 253'096'509   | 181'835'799   | 165'180'180   | 16'655'619  | NA                   | <i>C. aegagrus hircus</i> |
| IRCH-F4-5093                                              | 71'749'818    | 727'932'777   | 656'182'959   | 511'594'515   | 395'940'769   | 115'653'746 | NA                   | <i>C. aegagrus hircus</i> |
| IRCH-G5-5185                                              | 124'475'913   | 147'157'579   | 22'681'666    | 2'708'642     | 2'708'642     | 0           | NA                   | <i>C. aegagrus hircus</i> |
| MOCH-AA10-2195                                            | 146'220'987   | 340'288'629   | 194'067'642   | 151'554'435   | 114'959'593   | 36'594'842  | landrace             | <i>C. aegagrus hircus</i> |
| MOCH-L10-3100                                             | 120'386'963   | 1'032'323'265 | 911'936'302   | 708'108'515   | 574'495'587   | 133'612'928 | landrace             | <i>C. aegagrus hircus</i> |
| MOCH-Q15-1143                                             | 118'049'121   | 1'156'701'237 | 1'038'652'116 | 878'378'405   | 615'022'573   | 263'355'832 | landrace             | <i>C. aegagrus hircus</i> |
| MOCH-R5-0037                                              | 115'316'268   | 542'454'919   | 427'138'651   | 341'618'532   | 278'102'708   | 63'515'824  | landrace             | <i>C. aegagrus hircus</i> |
| MOCH-S8-2252                                              | 114'340'854   | 1'082'372'825 | 968'031'971   | 800'852'904   | 593'627'379   | 207'225'525 | landrace             | <i>C. aegagrus hircus</i> |
| MOCH-V5-3059                                              | 178'078'661   | 256'774'033   | 78'695'372    | 21'118'017    | 21'118'017    | 0           | landrace             | <i>C. aegagrus hircus</i> |
| hi.PCGA06                                                 | 828'868'429   | 990'581'676   | 161'713'247   | 91'561'239    | 91'561'239    | 0           | Peacock              | <i>C. aegagrus hircus</i> |
| FRCH-SA-0001                                              | 172'403'707   | 326'762'731   | 154'359'024   | 90'564'251    | 57'648'233    | 32'916'018  | Saanen               | <i>C. aegagrus hircus</i> |
| ITCH-SA-0001                                              | 198'698'577   | 342'352'391   | 143'653'814   | 90'281'895    | 78'559'944    | 11'721'951  | Saanen               | <i>C. aegagrus hircus</i> |
| ITCH-SA-0005                                              | 186'683'295   | 307'887'462   | 121'204'167   | 79'505'337    | 79'505'337    | 0           | Saanen               | <i>C. aegagrus hircus</i> |

**Supplementary Table 4: Deleterious mutations segregating among and within species.** SNPs were filtered as detailed in the Methods. For Alpine and Iberian ibex, we jointly defined a subset of SNPs for which either the Alpine and/or the Iberian ibex carried the derived allele. The SNPs include only sites for which no other species than Alpine and Iberian ibex carried the derived allele. See Methods for details on ancestral/derived state identification procedures.

| Variable sites within groups/species:   | All species    |      | <i>C. ibex</i> |      |                        |      | <i>C. pyrenaica</i> |      |                        |      | <i>C. hircus</i> |      | <i>C. aegagrus</i> |      | <i>C. sibirica</i> |      | <i>C. falconeri</i> |      | <i>C. nubiana</i> |      |
|-----------------------------------------|----------------|------|----------------|------|------------------------|------|---------------------|------|------------------------|------|------------------|------|--------------------|------|--------------------|------|---------------------|------|-------------------|------|
|                                         | number of SNPs | %    | number of SNPs | %    | number of SNPs derived | %    | number of SNPs      | %    | number of SNPs derived | %    | number of SNPs   | %    | number of SNPs     | %    | number of SNPs     | %    | number of SNPs      | %    | number of SNPs    | %    |
| <b>Total</b>                            | <b>370'853</b> |      | <b>22'255</b>  |      | <b>16'545</b>          |      | <b>29'100</b>       |      | <b>23'656</b>          |      | <b>123'791</b>   |      | <b>83'088</b>      |      | <b>58'850</b>      |      | <b>11'062</b>       |      | <b>43'141</b>     |      |
| <b>SnPEff category</b>                  |                |      |                |      |                        |      |                     |      |                        |      |                  |      |                    |      |                    |      |                     |      |                   |      |
| Stop gained                             | 444            | 0.12 | 60             | 0.27 | 38                     | 0.23 | 60                  | 0.21 | 39                     | 0.16 | 163              | 0.13 | 108                | 0.13 | 70                 | 0.12 | 29                  | 0.26 | 58                | 0.13 |
| High                                    | 614            | 0.17 | 69             | 0.31 | 41                     | 0.25 | 72                  | 0.25 | 47                     | 0.2  | 241              | 0.19 | 156                | 0.19 | 102                | 0.17 | 37                  | 0.33 | 76                | 0.18 |
| Moderate                                | 70'873         | 19.1 | 5157           | 23.2 | 3754                   | 22.7 | 6546                | 22.5 | 5254                   | 22.2 | 24540            | 19.8 | 15841              | 19.1 | 10491              | 17.8 | 2358                | 21.3 | 8457              | 19.6 |
| Low                                     | 122'677        | 33.1 | 7186           | 32.3 | 5068                   | 30.6 | 9236                | 31.7 | 7214                   | 30.5 | 41614            | 33.6 | 28435              | 34.2 | 20332              | 34.5 | 3612                | 32.7 | 14631             | 33.9 |
| Modifier                                | 176'689        | 47.6 | 9843           | 44.2 | 7682                   | 46.4 | 13246               | 45.5 | 11141                  | 47.1 | 57396            | 46.4 | 38656              | 46.5 | 27925              | 47.5 | 5055                | 45.7 | 19977             | 46.3 |
| <b>Range of GERP conservation score</b> |                |      |                |      |                        |      |                     |      |                        |      |                  |      |                    |      |                    |      |                     |      |                   |      |
| >6                                      | 4343           | 1.2  | 312            | 1.4  | 218                    | 1.3  | 369                 | 1.3  | 293                    | 1.2  | 1494             | 1.2  | 989                | 1.2  | 695                | 1.2  | 125                 | 1.1  | 507               | 1.2  |
| 4 - 6                                   | 96'528         | 26.0 | 5759           | 25.9 | 4277                   | 25.9 | 7545                | 25.9 | 6151                   | 26.0 | 32303            | 26.1 | 21652              | 26.1 | 15493              | 26.3 | 2874                | 26.0 | 11148             | 25.8 |
| 2 - 4                                   | 96'967         | 26.1 | 6040           | 27.1 | 4598                   | 27.8 | 7901                | 27.2 | 6492                   | 27.4 | 32525            | 26.3 | 21437              | 25.8 | 14748              | 25.1 | 2814                | 25.4 | 11205             | 26.0 |
| -2 - 2                                  | 173'015        | 46.7 | 10144          | 45.6 | 7452                   | 45.0 | 13285               | 45.7 | 10720                  | 45.3 | 57469            | 46.4 | 39010              | 47.0 | 27914              | 47.4 | 5249                | 47.5 | 20281             | 47.0 |

**Supplementary Table 5: Deleterious mutations (indels) segregating among and within species.** Identical to Supplementary Table 4 except showing indels instead of SNPs.

| Variable sites within groups/species:   | All species      |      | <i>C. ibex</i>   |       |                          |       | <i>C. pyrenaica</i> |       |                          |      | <i>C. hircus</i> |      | <i>C. aegagrus</i> |      | <i>C. sibirica</i> |      | <i>C. falconeri</i> |       | <i>C. nubiana</i> |       |
|-----------------------------------------|------------------|------|------------------|-------|--------------------------|-------|---------------------|-------|--------------------------|------|------------------|------|--------------------|------|--------------------|------|---------------------|-------|-------------------|-------|
|                                         | number of indels | %    | number of indels | %     | number of indels derived | %     | number of indels    | %     | number of indels derived | %    | number of indels | %    | number of indels   | %    | number of indels   | %    | number of indels    | %     | number of indels  | %     |
| <b>Total</b>                            | <b>27'039</b>    |      | <b>3'618</b>     |       | <b>2'012</b>             |       | <b>2'981</b>        |       | <b>1'960</b>             |      | <b>8'827</b>     |      | <b>5'730</b>       |      | <b>4'746</b>       |      | <b>1'052</b>        |       | <b>3'632</b>      |       |
| <b>SnPEff category</b>                  |                  |      |                  |       |                          |       |                     |       |                          |      |                  |      |                    |      |                    |      |                     |       |                   |       |
| Stop gained                             | 32               | 0.12 | 4                | 0.11  | 3                        | 0.15  | 2                   | 0.07  | 2                        | 0.1  | 9                | 0.1  | 8                  | 0.14 | 11                 | 0.23 | 0                   | 0     | 0                 | 0     |
| High                                    | 1'890            | 6.99 | 651              | 17.99 | 280                      | 13.92 | 354                 | 11.88 | 119                      | 6.07 | 825              | 9.35 | 500                | 8.73 | 394                | 8.3  | 186                 | 17.68 | 375               | 10.32 |
| Moderate                                | 1'273            | 4.7  | 248              | 6.9   | 119                      | 5.9   | 178                 | 6.0   | 103                      | 5.3  | 491              | 5.6  | 265                | 4.6  | 215                | 4.5  | 62                  | 5.9   | 185               | 5.1   |
| Low                                     | 95               | 0.4  | 12               | 0.3   | 5                        | 0.2   | 14                  | 0.5   | 11                       | 0.6  | 25               | 0.3  | 17                 | 0.3  | 19                 | 0.4  | 3                   | 0.3   | 15                | 0.4   |
| Modifier                                | 23'781           | 88   | 2'707            | 74.8  | 1'608                    | 79.9  | 2'435               | 81.7  | 1'727                    | 88.1 | 7'486            | 84.8 | 4'948              | 86.4 | 4'118              | 86.8 | 801                 | 76.1  | 3'057             | 84.2  |
| <b>Range of GERP conservation score</b> |                  |      |                  |       |                          |       |                     |       |                          |      |                  |      |                    |      |                    |      |                     |       |                   |       |
| >6                                      | 15'141           | 56   | 1'723            | 47.6  | 987                      | 49.1  | 1'551               | 52.0  | 1'053                    | 53.7 | 4'835            | 54.8 | 3'246              | 56.6 | 2'706              | 57.0 | 562                 | 53.4  | 2'067             | 56.9  |
| 4 - 6                                   | 7'358            | 27.2 | 975              | 26.9  | 534                      | 26.5  | 821                 | 27.5  | 546                      | 27.9 | 2'427            | 27.5 | 1'524              | 26.6 | 1'259              | 26.5 | 268                 | 25.5  | 933               | 25.7  |
| 2 - 4                                   | 4'357            | 16.1 | 877              | 24.2  | 470                      | 23.4  | 587                 | 19.7  | 346                      | 17.7 | 1'508            | 17.1 | 917                | 16.0 | 750                | 15.8 | 212                 | 20.2  | 608               | 16.7  |
| -2 - 2                                  | 183              | 0.7  | 43               | 1.2   | 21                       | 1.0   | 22                  | 0.7   | 15                       | 0.8  | 57               | 0.6  | 43                 | 0.8  | 31                 | 0.7  | 10                  | 1.0   | 24                | 0.7   |

**Supplementary Table 6: Predicted protein functions.** Predicted protein functions of genes for which at least one homozygote was found for the derived, high-impact allele.

| Gene name                                 | Predicted protein function                                   | Polymorphism within species | SnpEff stop-gained |
|-------------------------------------------|--------------------------------------------------------------|-----------------------------|--------------------|
| <b>Alpine ibex (<i>C. ibex</i>)</b>       |                                                              |                             |                    |
| <b>KNG1</b>                               | kininogen-1 isoforms X1-3                                    | Segregating                 | yes                |
| <b>LOC102181723</b>                       | protein FAM188B2                                             | Fixed                       | yes                |
| <b>LOC102181167</b>                       | 60S ribosomal protein L10a-like                              | Fixed                       | yes                |
| <b>DIS3L2</b>                             | DIS3-like exonuclease 2                                      | Segregating                 | yes                |
| <b>EPHA8</b>                              | ephrin type-A receptor 8                                     | Segregating                 | yes                |
| <b>LOC102178786</b>                       | coiled-coil domain-containing protein 30-like                | Segregating                 | no                 |
| <b>LOC102180106</b>                       | unknown                                                      | Segregating                 | no                 |
| <b>OVCH1</b>                              | ovochoymase-1                                                | Fixed                       | yes                |
| <b>ERAP2</b>                              | endoplasmic reticulum aminopeptidase 2                       | Segregating                 | no                 |
| <b>TLN2</b>                               | talin-2                                                      | Segregating                 | yes                |
| <b>POLR1A</b>                             | DNA-directed RNA polymerase I subunit RPA1                   | Segregating                 | yes                |
| <b>LOC102188952</b>                       | unknown                                                      | Segregating                 | yes                |
| <b>OOEP</b>                               | oocyte-expressed protein homolog                             | Segregating                 | yes                |
| <b>FOXR1</b>                              | Forkhead box protein R1                                      | Segregating                 | yes                |
| <b>PNMAL1</b>                             | PNMA-like protein 1                                          | Segregating                 | yes                |
| <b>RAD1</b>                               | cell cycle checkpoint protein RAD1                           | Fixed                       | no                 |
| <b>KIF9</b>                               | kinesin-like protein KIF9 isoforms X1-3                      | Fixed                       | yes                |
| <b>LOC102179713</b>                       | C-C chemokine receptor type 1-like                           | Segregating                 | yes                |
| <b>CD2BP2</b>                             | CD2 antigen cytoplasmic tail-binding protein 2 isoforms X1-2 | Fixed                       | yes                |
| <b>LOC102189088</b>                       | zinc finger protein 205 isoform X1                           | Fixed                       | no                 |
| <b>LOC102188472</b>                       | synaptotagmin-15 isoforms X1-4                               | Segregating                 | yes                |
| <b>LOC102175191</b>                       | solute carrier family 22 member 9-like                       | Fixed                       | yes                |
|                                           |                                                              |                             |                    |
| <b>Iberian Ibex (<i>C. pyrenaica</i>)</b> |                                                              |                             |                    |
| <b>LOC102181723</b>                       | protein FAM188B2                                             | Segregating                 | yes                |
| <b>LOC102181167</b>                       | 60S ribosomal protein L10a-like                              | Segregating                 | yes                |
| <b>CAPZB</b>                              | F-actin-capping protein subunit beta                         | Segregating                 | yes                |
| <b>TMBIM6</b>                             | bax inhibitor 1                                              | Segregating                 | yes                |
| <b>LOC102191021</b>                       | protein HP-25 homolog 2                                      | Segregating                 | yes                |
| <b>OVCH1</b>                              | ovochoymase-1                                                | Fixed                       | yes                |
| <b>LOC102173270</b>                       | C-type lectin domain family 2 member B                       | Segregating                 | yes                |
| <b>TLR6</b>                               | toll-like receptor 6                                         | Segregating                 | yes                |
| <b>TLR6</b>                               | toll-like receptor 6 isoform X1                              | Segregating                 | yes                |
| <b>LOC106502316</b>                       | zinc finger protein 77-like                                  | Segregating                 | yes                |
| <b>LOC102191525</b>                       | eukaryotic translation initiation factor 3 subunit J         | Segregating                 | yes                |
| <b>TMEM244</b>                            | transmembrane protein 244                                    | Segregating                 | yes                |

| Gene name           | Predicted protein function                                   | Polymorphism within species | SnpEff stop-gained |
|---------------------|--------------------------------------------------------------|-----------------------------|--------------------|
| <b>IGF2R</b>        | cation-independent mannose-6-phosphate receptor              | Fixed                       | yes                |
| <b>PPP1R14D</b>     | protein phosphatase 1 regulatory subunit 14D                 | Segregating                 | yes                |
| <b>LOC102187409</b> | 60S ribosomal protein L36a-like                              | Segregating                 | yes                |
| <b>LOC102173760</b> | Fer-1-like protein 4                                         | Segregating                 | yes                |
| <b>SOGA1</b>        | protein SOGA1                                                | Segregating                 | yes                |
| <b>CCDC73</b>       | coiled-coil domain-containing protein 73                     | Segregating                 | yes                |
| <b>PER3</b>         | period circadian protein homolog 3                           | Segregating                 | yes                |
| <b>LOC102178853</b> | arachidonate 12-lipoxygenase epidermal-type-like             | Segregating                 | yes                |
| <b>LOC102171368</b> | keratin-associated protein 4-9-like                          | Fixed                       | yes                |
| <b>LOC102177379</b> | myeloid-associated differentiation marker-like               | Segregating                 | yes                |
| <b>KIF9</b>         | kinesin-like protein KIF9 isoforms X1-3                      | Fixed                       | yes                |
| <b>CLN3</b>         | battenin isoforms X1-3                                       | Segregating                 | yes                |
| <b>CD2BP2</b>       | CD2 antigen cytoplasmic tail-binding protein 2 isoforms X1-2 | Fixed                       | yes                |
| <b>LOC102189088</b> | zinc finger protein 205 isoform X1                           | Segregating                 | no                 |
| <b>LOC102170020</b> | deleted in malignant brain tumors 1 protein-like             | Segregating                 | no                 |

## Supplementary Note 1: Script used for individual based simulations.

```
run_mode overwrite
random_seed 30317
logfile logfile.log
root_dir SIMS/sim5000_0.0014_0.01
filename sim

replicates 100
generations 3023
patch_number 12
patch_capacity (@g0 {{1000, 0, 0, 0, 0, 0, 0, 0, 0, 0, 0, 0}}, @g3000 {{500, 0, 0, 0, 0, 0, 0, 0, 0, 0, 0, 0}}, @g3005 {{80,
0, 0, 0, 0, 0, 0, 0, 0, 0, 0, 0}}, @g3007 {{1000, 0, 0, 0, 0, 0, 0, 0, 0, 0, 0, 0}}, @g3010 {{1000, 25, 30, 0, 0, 0, 0, 0, 0,
0, 20, 0}}, @g3012 {{1000, 25, 30, 85, 73, 46, 0, 0, 0, 0, 20, 0}}, @g3017 {{1000, 25, 30, 85, 73, 46, 41, 30, 22,
116, 20, 43}})

ntrl_init 1
breed_selection 2
disperse 3
aging 4
save_stats 5
save_files 6

mating_system 1
mean_fecundity 5
dispersal_connectivity_matrix (@g0 {{1}{2}{3}{4}{5}{6}{7}{8}{9}{10}{11}{12}},@g3010
{{1,2,3,11}{2}{3}{4}{5}{6}{7}{8}{9}{10}{11}{12}},@g3011
{{1}{2}{3}{4}{5}{6}{7}{8}{9}{10}{11}{12}},@g3012
{{1}{2,6,4,5}{3,6,4,5}{4}{5}{6}{7}{8}{9}{10}{11}{12}},@g3013
{{1}{2}{3}{4}{5}{6}{7}{8}{9}{10}{11}{12}},@g3017
{{1,5}{2}{3}{4,7}{5,8}{6,9,12,10}{7}{8}{9}{10}{11}{12}},@g3018
{{1}{2}{3}{4}{5}{6}{7}{8}{9}{10}{11}{12,9}},@g3019 {{1}{2}{3}{4}{5}{6}{7}{8}{9}{10}{11}{12}})
dispersal_reduced_matrix (@g0 {{1}{1}{1}{1}{1}{1}{1}{1}{1}{1}{1}{1}},@g3010
{{0.854,0.060,0.076,0.010}{1}{1}{1}{1}{1}{1}{1}{1}{1}{1}{1}},@g3011
{{1}{1}{1}{1}{1}{1}{1}{1}{1}{1}{1}{1}},@g3012
{{1}{0.035,0.400,0.353,0.212}{0.333,0.49,0.059,0.118}{1}{1}{1}{1}{1}{1}{1}{1}{1}},@g3013
{{1}{1}{1}{1}{1}{1}{1}{1}{1}{1}{1}{1}},@g3017
{{0.996,0.004}{1}{1}{0.910,0.090}{0.839,0.161}{0.361,0.051,0.217,0.371}{1}{1}{1}{1}{1}{1}},@g3018
{{1}{1}{1}{1}{1}{1}{1}{1}{1}{1}{1}{1}{0.754,0.246}},@g3019 {{1}{1}{1}{1}{1}{1}{1}{1}{1}{1}{1}{1}})

## SELECTION TRAITS
selection_trait delet
selection_model direct
selection_fitness_model absolute

## NEUTRAL TRAITS
ntrl_loci 500
ntrl_all 2
ntrl_mutation_rate 5e-05
ntrl_recombination_rate 0.5
ntrl_mutation_model 1
ntrl_init_patch_freq {{0.0014}}

## DELETERIOUS TRAITS
delet_loci 5000
delet_mutation_rate 5e-05
delet_backmutation_rate 5e-07 # default
delet_recombination_rate 0.5
```



```
delet_mutation_model 1
delet_fitness_model 1
```

```
delet_init_freq 0.0014
delet_effects_distribution gamma
delet_effects_mean 0.01
delet_dominance_mean 0.37
```

```
delet_effects_dist_param1 0.3
```

```
## OUTPUT
```

```
stat_dir stats
stat_log_time (@g0 1000, @g3000 1)
stat_adlt.demography pop.patch fecundity migrants.patch migrants adlt.delet viability ntrl.freq
stat_output_compact
stat_output_CSV
```

```
ntrl_save_genotype FSTAT
ntrl_output_dir ntrl_geno
ntrl_output_logtime {{1, 1000, 2000, 2999, 3000, 3001, 3002, 3003, 3004, 3005, 3006, 3007, 3008, 3009, 3010, 3011,
  3012, 3013, 3014, 3015, 3016, 3017, 3018, 3019, 3020, 3021, 3022, 3023}}
```

```
delet_save_genotype
delet_genot_dir delet_geno
delet_genot_logtime {{1, 1000, 2000, 2999, 3000, 3001, 3002, 3003, 3004, 3005, 3006, 3007, 3008, 3009, 3010, 3011,
  3012, 3013, 3014, 3015, 3016, 3017, 3018, 3019, 3020, 3021, 3022, 3023}}
```

## Supplementary References

1. Piodi, M., 1984. Le Bouquetin des Alpes - *Capra ibex*. In: C.I.C. Kommission Grosswild (Editor), Der Steinbock in Eurasien. C.I.C. Symposium, Pontresina, Switzerland, 24-25 February 1984
2. Stuwe, M. & Nievergelt, B. Recovery of alpine ibex from near extinction - the result of effective protection, captive breeding, and reintroductions. *Applied Animal Behaviour Science* **29**, 379–387 (1991).
3. Aeschbacher, S., Futschik, A. & Beaumont, M. A. Approximate Bayesian computation for modular inference problems with many parameters: the example of migration rates. *Mol Ecol* **22**, 987–1002 (2013). DRYAD entry doi:10.5061/dryad.274b1
4. Terrier, G. & Rossi, P. Le bouquetin (*Capra ibex ibex*) dans les alpes maritimes franco-italiennes: occupation de l'espace, clonisation et régulation naturelles. *Travaux Scientifiques du Parc National de la Vanoise XVIII*, 271–288 (1994).
5. Alpi Maritime Natural Park
6. Biebach, I. & Keller, L. F. Inbreeding in reintroduced populations: the effects of early reintroduction history and contemporary processes. *Conserv Genet* **11**, 527–538 (2010).
7. Couturier M. Le bouquetin des Alpes. Edited by author, Grenoble, France, (1962).
8. Pérez JM, Granados JE, Soriguer RC, Fandos P, Márquez FJ, Crampe JP, et al. Distribution, status and conservation problems of the Spanish Ibex, *Capra pyrenaica* (Mammalia: Artiodactyla). *Mammal Review* **32**, 26–39 (2002);.
9. Peña, J. *La cabra montés en España*. International Game Congress, Switzerland (1978).
10. Ortuño, F. & Peña, J. Reservas y cotos nacionales de caza. INCAFO, Madrid, UK. (1979)
11. Alados CL. Distribution and status of the Spanish ibex (*Capra pyrenaica*, Schinz). In: *The Biology and Management of Mountain Ungulates* (Ed. by Lovari S.), pp. 204–211. Croom-Helm, Beckenham London, UK, (1985).
